# Supplementary material for: A thiol–ene click-based strategy to customize injectable polymer–nanoparticle hydrogel properties for therapeutic delivery
Source: Royal Society of Chemistry journal article supplement (doi:10.1039/d4bm01315h), 2025-01-01
Supplement: d4bm01315h1.xlsx [file d4bm01315h1.xlsx]

## Sheet: Figure2a-b
	G' (Pa)			G'' (Pa)
NF	21.9369	12.782	15.9077	9.89389	5.56936	9.3494
allyl	29.9471	17.6064	10.5732	11.7715	8.35202	7.81762
C3-S-C2	37.7195	20.726	28.4469	12.4412	8.52452	15.361
C3-S-C4	44.8219	31.5289	29.9945	12.5491	10.4916	19.0584
C3-S-tBu	51.9851	30.8449	27.5322	15.381	9.31283	14.7289
C3-S-C6	52.2597	46.699	46.5056	14.7878	13.8578	22.7432
C3-S-Bz	34.3551	38.268	40.0205	10.0711	12.5505	18.5325
C3-S-C8	70.689	61.9731	51.6007	23.62	19.6157	24.3879
C3-S-Ad	58.8573	49.9344	46.4824	16.2829	15.8304	21.1935
C3-S-C10	79.9072	77.8891	62.677	31.5417	29.2938	32.031
C12	54.7323	40.5059	46.4951	16.7419	18.3064	24.1927

## Sheet: Figure2c-d
	C12	C3-S-C10	C3-S-Ad	C3-S-C8	C3-S-Bz	C3-S-C6	C3-S-C4	C3-S-tBu	C3-S-C2	allyl	NF
Shear Rate (1/s)	Viscosity (Pa s)	Viscosity (Pa s)	Viscosity (Pa s)	Viscosity (Pa s)	Viscosity (Pa s)	Viscosity (Pa s)	Viscosity (Pa s)	Viscosity (Pa s)	Viscosity (Pa s)	Viscosity (Pa s)	Viscosity (Pa s)
10.0009	8.97807	7.24569	7.24569	10.9368	15.9124	16.4021	10.0488	11.3288	10.1288	4.44669	5.08793
7.94364	10.0967	8.99553	8.99553	10.7971	17.2817	18.2889	11.9015	12.6879	11.4777	5.17207	6.06525
6.30986	11.4527	10.8639	10.8639	11.8561	19.7465	20.7593	14.453	14.8382	13.4003	6.21056	7.36428
5.01195	10.6834	13.6442	13.6442	13.2386	22.8117	23.3791	17.5333	17.6743	16.0769	7.66328	8.9927
3.98164	11.5348	17.1058	17.1058	15.1739	26.9994	26.1097	21.5823	21.2354	19.2633	9.44833	11.0754
3.16271	13.4514	21.1201	21.1201	17.7548	31.6438	29.8578	26.5184	25.5656	23.3697	11.578	13.6449
2.51205	15.6565	25.7264	25.7264	20.9806	37.0554	33.8357	32.955	31.1624	28.0423	14.2552	16.848
1.99544	18.7465	32.0042	32.0042	25.4081	43.9349	39.4249	40.4195	37.409	34.0735	17.6691	20.9044
1.5851	23.066	40.5008	40.5008	30.6257	50.6958	43.9531	49.8827	45.0963	41.2062	21.8835	25.8489
1.25906	29.5243	49.9648	49.9648	39.5731	58.3005	50.3032	60.9798	54.2736	47.8376	27.3515	32.2856
1.00004	35.4345	61.278	61.278	48.6039	66.7779	58.7057	74.0814	65.2695	56.5965	33.5907	40.127
0.794381	45.9958	76.6785	76.6785	57.7283	73.8205	67.9858	86.9687	78.4257	65.1403	41.5543	49.4149
0.630987	59.6768	93.7148	93.7148	70.8956	86.6903	79.4602	102.705	92.4802	75.5392	51.1059	60.4935
0.50123	80.4248	115.103	115.103	87.392	103.484	93.7407	121.497	111.558	85.5424	62.6385	74.0038
0.398135	108.267	141.641	141.641	107.735	123.401	115.647	143.694	130.582	103.405	78.1794	90.823
0.316238	147.537	175.222	175.222	133.827	149.592	139.541	167.037	151.965	124.721	94.2252	112.534
0.25121	204.442	211.657	211.657	170.517	180.645	164.589	188.867	180.436	149.765	115.269	134.524
0.199555	287.615	261.809	261.809	217.512	222.267	198.117	221.029	215.347	176.604	141.871	164.509
0.158486	388.233	323.508	323.508	284.887	277.333	238.435	260.677	257.006	213.886	175.711	203.111
0.125913	519.852	404.253	404.253	375.273	343.06	291.347	309.753	305.234	264.131	218.315	247.176
0.100001	694.545	507.101	507.101	502.829	421.49	358.499	367.038	375.135	326.915	271.083	300.712

## Sheet: Figure2e-f
	Yield Stress (Pa)
C12	70.9621
C3-S-C10	100.237
C3-S-Ad	63.2454
C3-S-C8	100.237
C3-S-Bz	89.3362
C3-S-C6	126.191
C3-S-C4	56.3676
C3-S-tBu	63.2454
C3-S-C2	63.2454
allyl	25.1784
NF	31.6978

## Sheet: Figure3a-b
	NF	allyl	C3-S-C2	C3-S-tBu	C3-S-C4	C3-S-C6	C3-S-Bz	C3-S-C8	C3-S-Ad	C3-S-10	C12
Time (s)	G/G0	G/G0	G/G0	G/G0	G/G0	G/G0	G/G0	G/G0	G/G0	G/G0	G/G0
15.0324	0.990587	0.992014	1.00087	0.989144	0.999962	0.982516	0.993564	0.975353	1.00273	1.00659	0.985452
15.2945	0.97273	0.985853	0.971225	0.990245	0.987006	1.00091	0.995677	0.996918	0.99052	0.988332	1.00032
15.5566	1.00161	0.983491	0.983726	0.982014	1.00149	0.966095	0.993079	0.966526	1.00213	1.00403	0.981121
15.8188	0.951479	0.96776	0.961647	0.986923	0.980258	0.994078	0.994465	0.988264	0.98298	0.988061	0.997773
16.0809	0.99319	0.969705	0.971191	0.971633	0.992896	0.959773	0.983548	0.973164	1.00106	1.00054	0.976324
16.3431	0.942203	0.960283	0.950477	0.984791	0.978009	0.985427	0.999905	0.967841	0.97853	0.984049	0.994544
16.6052	0.985321	0.963402	0.953688	0.972713	0.989655	0.960821	0.975228	0.965901	0.997916	1.00093	0.971604
16.8674	0.931256	0.945759	0.944669	0.971435	0.970051	0.977208	0.995988	0.95215	0.975512	0.981872	0.990391
17.1295	0.979966	0.962266	0.944223	0.969267	0.988137	0.94833	0.971767	0.960748	0.997356	0.996736	0.965299
17.3916	0.931414	0.936029	0.935622	0.963455	0.967728	0.971897	0.994795	0.941921	0.97211	0.983604	0.989648
17.6538	0.957343	0.946985	0.925158	0.971789	0.979101	0.945834	0.967811	0.961596	0.993802	0.993634	0.960702
17.9159	0.938185	0.931292	0.935785	0.948792	0.966209	0.957728	0.992342	0.934245	0.969717	0.978936	0.985605
18.1781	0.944278	0.942447	0.904704	0.973004	0.979709	0.939776	0.968461	0.949063	0.990928	0.993475	0.9568
18.4402	0.925295	0.910697	0.929758	0.936619	0.95564	0.946302	0.986854	0.928132	0.965763	0.976996	0.982645
18.7024	0.936637	0.937544	0.899359	0.964627	0.979829	0.931571	0.964221	0.935286	0.990416	0.99071	0.951319
18.9645	0.909583	0.909439	0.920626	0.938336	0.956404	0.945612	0.989637	0.922064	0.961385	0.976214	0.979286
19.2267	0.933059	0.930022	0.882551	0.957179	0.969304	0.923726	0.955726	0.928737	0.987711	0.989936	0.948087
19.4888	0.904044	0.900094	0.91466	0.923836	0.955591	0.939267	0.986631	0.913079	0.962665	0.973003	0.975589
19.7509	0.924978	0.919226	0.878927	0.957476	0.962081	0.920906	0.958964	0.923543	0.981299	0.987087	0.943201
20.0131	0.89075	0.891417	0.901876	0.921052	0.952774	0.924198	0.978069	0.90255	0.958383	0.971863	0.972524
20.2752	0.922596	0.905954	0.862215	0.943663	0.96104	0.918975	0.962112	0.918279	0.977257	0.983684	0.941024
20.5374	0.890662	0.893047	0.886214	0.922561	0.949952	0.920009	0.970526	0.898266	0.960072	0.9723	0.965879
20.7995	0.905072	0.881289	0.857214	0.935276	0.954432	0.908728	0.964496	0.916568	0.975856	0.979999	0.940321
21.1927	0.896007	0.877079	0.86651	0.924605	0.948382	0.90739	0.964607	0.898565	0.965195	0.974495	0.950179
21.717	0.884964	0.872105	0.853704	0.921736	0.947644	0.902434	0.961812	0.89314	0.961344	0.973409	0.94667
22.2413	0.876317	0.863671	0.845102	0.912846	0.942033	0.900006	0.958957	0.887529	0.959471	0.971689	0.945152
22.7656	0.871348	0.85423	0.836089	0.909573	0.9392	0.891684	0.956547	0.880061	0.958495	0.969548	0.940718
23.2899	0.854341	0.85948	0.825365	0.906881	0.9355	0.890361	0.953821	0.875612	0.957326	0.967583	0.936892
23.8142	0.856629	0.84986	0.81695	0.900768	0.932197	0.88215	0.953056	0.868643	0.953836	0.965817	0.935031
24.3385	0.851462	0.840117	0.812113	0.895774	0.931841	0.876404	0.94786	0.861128	0.952276	0.96408	0.930759
24.8628	0.843149	0.830669	0.803116	0.890996	0.928628	0.872724	0.946313	0.856539	0.94937	0.962337	0.927421
25.387	0.839687	0.830227	0.794746	0.888046	0.921244	0.868753	0.945813	0.84979	0.946945	0.960801	0.92574
25.9113	0.837505	0.82051	0.785947	0.883261	0.921366	0.862948	0.94424	0.846838	0.945752	0.959391	0.922435
26.4356	0.830624	0.812481	0.774806	0.880034	0.919122	0.859617	0.940837	0.84202	0.943175	0.957627	0.919554
26.9599	0.827028	0.807943	0.76683	0.875646	0.916499	0.854061	0.939406	0.839273	0.940133	0.95565	0.917047
27.4842	0.818807	0.802609	0.760701	0.871778	0.913564	0.849818	0.936756	0.832597	0.939661	0.953922	0.913323
28.0085	0.811608	0.797411	0.753533	0.867238	0.913116	0.843581	0.934379	0.827858	0.936539	0.952338	0.913145
28.5328	0.808793	0.792604	0.750559	0.8649	0.907752	0.840168	0.932981	0.821537	0.935515	0.950746	0.90881
29.0571	0.802675	0.78607	0.740958	0.860427	0.907211	0.835302	0.931879	0.819747	0.93349	0.950197	0.907517
29.5813	0.796696	0.782996	0.732865	0.860069	0.903961	0.83023	0.930297	0.817526	0.931064	0.947981	0.903505
30.1056	0.794983	0.773099	0.723636	0.854147	0.899786	0.827305	0.928244	0.811781	0.929992	0.94654	0.900562
30.6299	0.788946	0.766463	0.720092	0.852093	0.895807	0.823408	0.926515	0.806334	0.927679	0.945733	0.897614
31.1542	0.781734	0.766001	0.711378	0.848077	0.894406	0.819199	0.924403	0.801384	0.924085	0.944169	0.896212
31.6785	0.778937	0.758177	0.705796	0.844273	0.894019	0.818106	0.922068	0.79783	0.922828	0.942138	0.89186
32.2028	0.771424	0.755096	0.699875	0.83936	0.890843	0.813596	0.920094	0.796181	0.920355	0.940684	0.890966
32.7271	0.768744	0.746766	0.692735	0.838687	0.888925	0.806686	0.917406	0.79075	0.918514	0.940356	0.88724
33.2514	0.76522	0.744352	0.685883	0.836169	0.886322	0.8076	0.914257	0.784411	0.918506	0.938512	0.887246
33.7756	0.75883	0.740636	0.675769	0.831405	0.882584	0.802695	0.91346	0.781747	0.917801	0.936623	0.884147
34.2999	0.754819	0.735842	0.67087	0.827789	0.880523	0.797629	0.910032	0.77913	0.916032	0.93497	0.883241
34.8242	0.752579	0.732742	0.666242	0.822961	0.878688	0.794692	0.90938	0.775297	0.913679	0.932893	0.879641
35.3485	0.745466	0.723526	0.663036	0.8196	0.876227	0.792031	0.907929	0.772245	0.910381	0.931554	0.877401
35.8728	0.742951	0.719668	0.65549	0.820372	0.873664	0.788475	0.90811	0.767533	0.912655	0.931163	0.873731
36.3971	0.735989	0.719553	0.651201	0.815067	0.872371	0.784232	0.905813	0.7653	0.910629	0.929525	0.872062
36.9214	0.728877	0.71463	0.643209	0.81274	0.869071	0.782258	0.903953	0.761124	0.907348	0.928252	0.870599
37.4457	0.724908	0.705196	0.639862	0.808543	0.868905	0.780821	0.902867	0.757303	0.906819	0.928321	0.868709
37.97	0.725292	0.699098	0.6292	0.805691	0.864776	0.777606	0.902842	0.756086	0.905139	0.926862	0.867063
38.4942	0.718047	0.696749	0.623923	0.803896	0.86304	0.773402	0.901272	0.752338	0.90357	0.926571	0.865563
39.0185	0.714836	0.693694	0.621795	0.801647	0.862293	0.770378	0.900098	0.745739	0.902001	0.924355	0.861209
39.5428	0.712263	0.686557	0.617206	0.798324	0.858679	0.767611	0.896293	0.74605	0.901328	0.922615	0.859931
40.0671	0.708393	0.681192	0.613182	0.797319	0.855908	0.76545	0.89306	0.742802	0.897983	0.922293	0.858774
40.5914	0.69818	0.676847	0.605884	0.792551	0.855054	0.760977	0.893816	0.741467	0.897174	0.919557	0.856282
41.1157	0.698767	0.671905	0.596876	0.790557	0.852432	0.760662	0.89271	0.735791	0.896054	0.918356	0.854158
41.64	0.691979	0.666719	0.595776	0.789484	0.851634	0.7553	0.890613	0.736369	0.89338	0.916938	0.851798
42.4264	0.688195	0.660904	0.585921	0.784869	0.847658	0.750287	0.888113	0.729796	0.891083	0.915609	0.85025
43.475	0.678923	0.649576	0.575497	0.778575	0.844308	0.743584	0.885177	0.72376	0.888089	0.913575	0.846746
44.5236	0.672118	0.644782	0.563865	0.772685	0.840508	0.739137	0.881244	0.719514	0.88572	0.910905	0.84309
45.5721	0.665263	0.6359	0.556436	0.768761	0.837231	0.734899	0.878186	0.711932	0.883207	0.908607	0.84005
46.6207	0.655753	0.631062	0.545793	0.762038	0.831245	0.729034	0.875188	0.70984	0.88071	0.90641	0.837297
47.6693	0.649308	0.620097	0.537902	0.757997	0.828907	0.722553	0.873181	0.704566	0.878244	0.904036	0.832743
48.7179	0.639749	0.610728	0.530773	0.756187	0.824949	0.718628	0.871438	0.698941	0.876379	0.901425	0.828464
49.7664	0.63737	0.606927	0.520823	0.748413	0.820778	0.713854	0.868522	0.695719	0.874026	0.900252	0.825936
50.815	0.631684	0.604646	0.510746	0.746469	0.817363	0.709012	0.864937	0.690208	0.870888	0.897305	0.82254
51.8636	0.626043	0.593794	0.503295	0.740642	0.814263	0.704834	0.863362	0.686414	0.869023	0.894934	0.818983
52.9122	0.618411	0.586735	0.495212	0.737961	0.811067	0.701372	0.862054	0.681573	0.865173	0.892793	0.815686
53.9607	0.616392	0.584074	0.486495	0.732985	0.807529	0.699014	0.858597	0.67916	0.863196	0.891449	0.812526
55.0093	0.602191	0.575839	0.477177	0.731497	0.804308	0.694408	0.856144	0.672881	0.860475	0.888676	0.809635
56.0579	0.603424	0.567668	0.469517	0.726266	0.801168	0.689404	0.853867	0.669723	0.85825	0.887026	0.805763
57.1065	0.595582	0.564133	0.459493	0.721651	0.797216	0.683025	0.850876	0.665806	0.855808	0.885053	0.803016
58.155	0.589209	0.554859	0.453421	0.718722	0.796026	0.681608	0.848039	0.663602	0.854111	0.88273	0.800617
59.2036	0.586177	0.547436	0.444552	0.714628	0.79292	0.676484	0.845655	0.661114	0.851702	0.880982	0.797768
60.2522	0.582848	0.543184	0.439138	0.710611	0.789124	0.670923	0.841081	0.653382	0.849157	0.879153	0.795481
61.3008	0.568407	0.5382	0.430125	0.705978	0.787426	0.668776	0.840883	0.660897	0.846683	0.876501	0.791567
62.3493	0.577503	0.534007	0.42404	0.700949	0.783978	0.665632	0.837981	0.637513	0.845107	0.87486	0.789166
63.3979	0.570586	0.531524	0.418183	0.699557	0.78042	0.662511	0.835015	0.644194	0.842849	0.87289	0.7858
64.4465	0.560398	0.520207	0.410957	0.694722	0.778318	0.658037	0.834523	0.641911	0.839952	0.871906	0.784248
65.4951	0.557973	0.515394	0.401619	0.691266	0.775564	0.654766	0.833026	0.636098	0.837863	0.869502	0.781086
66.5436	0.555355	0.514517	0.396975	0.688308	0.771752	0.65211	0.832037	0.636304	0.836614	0.867189	0.779518
67.5922	0.549833	0.50971	0.388103	0.683984	0.76939	0.648696	0.828144	0.631383	0.834589	0.865927	0.776309
68.6408	0.543269	0.500894	0.383157	0.684827	0.766531	0.64691	0.825022	0.628492	0.832676	0.86365	0.773644
69.6894	0.539417	0.498986	0.37857	0.677768	0.765138	0.640977	0.823353	0.625035	0.831859	0.862843	0.771477
70.738	0.532434	0.490222	0.370637	0.676199	0.761408	0.638796	0.822402	0.621523	0.828386	0.860694	0.769589
71.7865	0.529506	0.486911	0.364771	0.673411	0.758898	0.63493	0.81903	0.620455	0.825592	0.858795	0.766645
72.8351	0.528589	0.480419	0.359224	0.67062	0.756578	0.633033	0.817192	0.615669	0.825024	0.856863	0.764155
73.8837	0.52045	0.476033	0.353194	0.668552	0.754381	0.628659	0.814735	0.613051	0.823103	0.855501	0.76074
74.9323	0.524338	0.474541	0.344785	0.663802	0.751085	0.625456	0.811086	0.610768	0.820533	0.853815	0.759088
75.9808	0.518747	0.464088	0.342221	0.662304	0.748902	0.621735	0.810644	0.607998	0.817588	0.852098	0.756531
77.0294	0.514089	0.462756	0.335607	0.660129	0.746176	0.618986	0.809683	0.607136	0.817388	0.850317	0.753279
78.078	0.509556	0.455339	0.327619	0.655989	0.744433	0.616652	0.806803	0.602851	0.815603	0.848689	0.751386
79.1266	0.507489	0.452107	0.323933	0.653694	0.742015	0.61739	0.804836	0.601798	0.812393	0.846928	0.749927
80.1751	0.499013	0.448916	0.316884	0.649915	0.740695	0.613624	0.803226	0.59948	0.811513	0.844866	0.747758
81.2237	0.494585	0.444757	0.312722	0.647071	0.737653	0.6095	0.802126	0.596047	0.809976	0.843085	0.746239
82.2723	0.488201	0.439506	0.306821	0.643823	0.7365	0.607381	0.799796	0.596167	0.809167	0.842109	0.742276
83.3209	0.489115	0.430162	0.302429	0.642165	0.732214	0.604013	0.800193	0.593068	0.806854	0.840816	0.740901
84.8937	0.481182	0.426277	0.294775	0.636732	0.730537	0.599006	0.795034	0.587666	0.804277	0.838598	0.737881
86.9909	0.47176	0.415316	0.283747	0.632106	0.72639	0.593331	0.790505	0.583085	0.800259	0.834175	0.733696
89.088	0.468843	0.408558	0.273705	0.626355	0.721289	0.589037	0.786321	0.57778	0.797158	0.832039	0.730084
91.1852	0.46515	0.399008	0.263744	0.621828	0.717487	0.585155	0.783366	0.573393	0.794122	0.829249	0.725519
93.2823	0.457041	0.391224	0.252929	0.617805	0.712504	0.580809	0.781012	0.570881	0.791227	0.826305	0.72144
95.3795	0.450014	0.386546	0.244869	0.612772	0.709133	0.574507	0.777331	0.568102	0.787939	0.823405	0.717542
97.4766	0.447605	0.38112	0.237829	0.609588	0.704908	0.570122	0.773778	0.562785	0.78446	0.820643	0.713638
99.5738	0.439538	0.37313	0.228497	0.602412	0.700957	0.566203	0.7704	0.559367	0.781047	0.817686	0.709792
101.671	0.434781	0.365112	0.218275	0.600202	0.696513	0.561991	0.767009	0.556051	0.77888	0.814673	0.705969
103.768	0.424655	0.358657	0.20996	0.598193	0.692827	0.558367	0.763384	0.554099	0.77603	0.812297	0.701661
105.865	0.423982	0.35345	0.203226	0.591553	0.688423	0.554274	0.761017	0.552227	0.772513	0.8093	0.69958
107.962	0.419333	0.345647	0.196003	0.587175	0.68713	0.549202	0.758189	0.547746	0.769192	0.806645	0.696013
110.06	0.411765	0.338812	0.186463	0.582815	0.682955	0.545092	0.755625	0.543612	0.766601	0.804102	0.69228
112.157	0.407685	0.334008	0.180661	0.57821	0.679817	0.543056	0.7526	0.539093	0.764573	0.800949	0.688902
114.254	0.400241	0.325558	0.171612	0.574116	0.674993	0.53885	0.749109	0.536704	0.761263	0.799475	0.685708
116.351	0.397451	0.319874	0.164868	0.570075	0.672194	0.535586	0.745865	0.533969	0.75893	0.796677	0.681729
118.448	0.394416	0.315436	0.156529	0.567001	0.66867	0.530531	0.742702	0.532253	0.755858	0.79348	0.678648
120.545	0.390046	0.308741	0.151751	0.562789	0.663807	0.529932	0.740665	0.529084	0.75337	0.791528	0.67564
122.642	0.38558	0.302572	0.143563	0.558362	0.661109	0.524362	0.738769	0.525284	0.750619	0.789594	0.673059
124.74	0.378343	0.297743	0.136947	0.556156	0.657665	0.521585	0.735419	0.522288	0.748516	0.786525	0.6706
126.837	0.373355	0.291652	0.131608	0.553641	0.655568	0.51979	0.733543	0.520944	0.745943	0.784457	0.667012
128.934	0.372018	0.287229	0.126047	0.549295	0.651745	0.516955	0.730405	0.517616	0.743303	0.782012	0.663601
131.031	0.363586	0.278628	0.120133	0.544616	0.649074	0.512752	0.727153	0.514878	0.741013	0.779245	0.661031
133.128	0.363089	0.275021	0.112263	0.542027	0.645793	0.509406	0.72488	0.513038	0.738811	0.777482	0.65969
135.225	0.360046	0.271836	0.105631	0.538358	0.642191	0.506433	0.721474	0.51222	0.735837	0.774901	0.655461
137.323	0.349568	0.268161	0.0987626	0.535634	0.639051	0.502559	0.719024	0.509605	0.734485	0.77256	0.652868
139.42	0.34338	0.257285	0.0952277	0.532082	0.637447	0.499088	0.71848	0.504843	0.732	0.771183	0.649294
141.517	0.343067	0.258051	0.0898794	0.530063	0.635042	0.496487	0.71578	0.504822	0.729221	0.768663	0.647433
143.614	0.342866	0.250653	0.0852372	0.525572	0.631469	0.494592	0.712305	0.500808	0.727446	0.766351	0.644613
145.711	0.340401	0.247677	0.0784163	0.522692	0.629909	0.492093	0.709623	0.499308	0.725352	0.764204	0.641862
147.808	0.3306	0.241695	0.0717264	0.519321	0.626018	0.488131	0.70841	0.49814	0.722641	0.761943	0.638693
149.905	0.331266	0.238797	0.0693012	0.516275	0.624957	0.486049	0.706347	0.496403	0.720545	0.759781	0.636705
152.003	0.327499	0.235666	0.0639167	0.51326	0.621343	0.483951	0.703605	0.494396	0.718698	0.757614	0.633573
154.1	0.323678	0.230237	0.0579877	0.51054	0.619797	0.48148	0.70082	0.492547	0.716174	0.755563	0.631742
156.197	0.317286	0.226804	0.0542265	0.507923	0.616731	0.478997	0.698721	0.490669	0.713339	0.753638	0.62894
158.294	0.317865	0.222407	0.0487773	0.504778	0.614469	0.476688	0.696695	0.489598	0.713192	0.751441	0.627416
160.391	0.315749	0.219819	0.0441252	0.502224	0.611079	0.47434	0.694373	0.486778	0.710174	0.749793	0.624718
162.488	0.310531	0.209146	0.0389249	0.49961	0.609609	0.470821	0.692829	0.485132	0.707707	0.747749	0.622298
164.586	0.305499	0.204541	0.0348834	0.496812	0.605859	0.469264	0.689733	0.483298	0.706002	0.746008	0.619616
166.683	0.304965	0.199362	0.0284368	0.494383	0.604521	0.466481	0.687902	0.481036	0.703967	0.74435	0.617256
169.828	0.295226	0.192322	0.0244798	0.490635	0.60022	0.462661	0.684799	0.478263	0.7008	0.741189	0.613442
174.023	0.293548	0.181928	0.0144788	0.484621	0.596038	0.45737	0.680659	0.475314	0.697204	0.737499	0.609216
178.217	0.286265	0.17307	0.00755294	0.47984	0.59152	0.453681	0.677005	0.472743	0.693565	0.733994	0.605333
182.411	0.282255	0.167428		0.475246	0.585783	0.449949	0.672334	0.470492	0.690039	0.729913	0.601236
186.606	0.274637	0.157666		0.470642	0.582498	0.445308	0.668925	0.466584	0.685999	0.726831	0.596683
190.8	0.270753	0.156178		0.465598	0.577414	0.442602	0.665342	0.463585	0.682546	0.723157	0.591805
194.994	0.264974	0.148733		0.460933	0.573496	0.437484	0.661257	0.460662	0.679259	0.720205	0.588309
199.189	0.258744	0.142171		0.456411	0.568809	0.434516	0.657906	0.45921	0.675627	0.716728	0.584098
203.383	0.257301	0.137131		0.452107	0.564931	0.430418	0.654084	0.456014	0.672068	0.713661	0.58073
207.577	0.251635	0.128365		0.447273	0.561394	0.427058	0.650413	0.454116	0.669063	0.709995	0.577135
211.771	0.245714	0.124271		0.443752	0.558076	0.423425	0.647432	0.451081	0.665797	0.706859	0.573513
215.966	0.239133	0.116398		0.440929	0.553705	0.420815	0.643825	0.448558	0.662431	0.70376	0.569527
220.16	0.237732	0.114879		0.437125	0.548919	0.416853	0.641025	0.446524	0.65944	0.700668	0.565924
224.354	0.233198	0.106517		0.431572	0.544548	0.413794	0.637727	0.44403	0.656897	0.6973	0.562714
228.549	0.22909	0.0982329		0.426889	0.541877	0.410579	0.634393	0.442569	0.653233	0.694717	0.558615
232.743	0.224205	0.0974608		0.42413	0.538032	0.408262	0.631159	0.4403	0.650403	0.691449	0.55577
236.937	0.222819	0.0917108		0.419374	0.534211	0.405263	0.628037	0.438343	0.647188	0.688947	0.552709
241.132	0.217302	0.084864		0.416413	0.531497	0.401707	0.625226	0.436318	0.644416	0.686131	0.549857
245.326	0.21193	0.0779145		0.413395	0.527572	0.399855	0.622194	0.435209	0.64187	0.683093	0.546116
249.52	0.211593	0.0760898		0.41014	0.523919	0.39789	0.619443	0.432518	0.639525	0.680118	0.543324
253.714	0.207313	0.0690113		0.404997	0.520958	0.394272	0.616127	0.430538	0.636398	0.677959	0.540151
257.909	0.203231	0.0639577		0.403269	0.517333	0.391803	0.613032	0.428862	0.6335	0.675087	0.536991
262.103	0.19904	0.0611077		0.399153	0.51388	0.390466	0.610384	0.427644	0.631199	0.672619	0.533358
266.297	0.196846	0.0557348		0.395403	0.510573	0.38791	0.607719	0.426556	0.628318	0.669496	0.530959
270.492	0.193147	0.0497888		0.393033	0.507042	0.385348	0.60544	0.424757	0.626422	0.667291	0.52826
274.686	0.190323	0.0476234		0.389877	0.50456	0.384391	0.601924	0.423695	0.623837	0.664848	0.525575
278.88	0.185237	0.0398116		0.386955	0.500415	0.382451	0.598897	0.422122	0.620365	0.662388	0.523099
283.075	0.18565	0.0397071		0.38245	0.498009	0.379986	0.595873	0.420285	0.618767	0.660269	0.519758
287.269	0.179959	0.0351393		0.381349	0.49538	0.376728	0.594717	0.418445	0.615958	0.6573	0.517586
291.463	0.17626	0.0269163		0.378175	0.491672	0.374314	0.591168	0.41716	0.61417	0.655074	0.514724
295.658	0.174986	0.0250631		0.375483	0.489102	0.371994	0.589085	0.415335	0.611677	0.652568	0.512205
299.852	0.17052	0.0211885		0.372274	0.486127	0.36921	0.587238	0.414167	0.60924	0.65036	0.509949
304.046	0.168432	0.0168161		0.369944	0.483354	0.368552	0.583768	0.412066	0.606803	0.648058	0.507555
308.24	0.166503	0.0126908		0.368803	0.479827	0.366478	0.581723	0.411359	0.604699	0.645768	0.504408
312.435	0.162998	0.00963146		0.364454	0.476958	0.363275	0.579188	0.410082	0.603045	0.643788	0.502159
316.629	0.161065	0.00782944		0.361603	0.474366	0.363542	0.576269	0.409348	0.600237	0.640997	0.499714
320.823	0.158354	-0.0091298		0.358805	0.471902	0.361866	0.574237	0.407767	0.598408	0.638897	0.497681
325.018	0.156823	-0.0125349		0.357579	0.469233	0.357859	0.571777	0.404906	0.595402	0.636751	0.494775
329.212	0.154238	-0.0208281		0.353683	0.467112	0.356399	0.570349	0.404243	0.594138	0.634696	0.492656
333.406	0.149852			0.351152	0.464285	0.355334	0.567939	0.403647	0.591626	0.632603	0.491038
339.698	0.147719			0.347595	0.460554	0.351679	0.564525	0.401296	0.588643	0.629529	0.487035
348.086	0.143843			0.342787	0.45525	0.349051	0.560591	0.399624	0.58468	0.625359	0.482911
356.475	0.138168			0.338757	0.45051	0.34599	0.555932	0.397086	0.580507	0.621432	0.479075
364.864	0.132484			0.333078	0.446761	0.34161	0.551827	0.395299	0.577213	0.617696	0.474579
373.252	0.131742			0.328762	0.441937	0.338537	0.547971	0.392751	0.573254	0.613807	0.470801
381.641	0.126706			0.324305	0.43731	0.335672	0.54353	0.391111	0.569441	0.61	0.466896
390.029	0.120937			0.31998	0.433724	0.33244	0.540555	0.389852	0.566459	0.606187	0.46275
398.418	0.118546			0.315928	0.429222	0.329395	0.536121	0.387784	0.562213	0.602824	0.459272
406.807	0.114702			0.311954	0.425085	0.325896	0.532966	0.385216	0.559273	0.599201	0.455681
415.195	0.112052			0.308492	0.421386	0.323195	0.528812	0.384248	0.556217	0.59567	0.452147
423.584	0.107695			0.304216	0.417089	0.320349	0.525273	0.381727	0.552465	0.592519	0.4486
431.972	0.104094			0.299347	0.414094	0.3166	0.522439	0.380345	0.549316	0.589128	0.445171
440.361	0.100138			0.296327	0.409469	0.315305	0.518921	0.379054	0.546349	0.585888	0.441939
448.75	0.0973556			0.292783	0.406422	0.310971	0.515355	0.3781	0.543334	0.582617	0.438668
457.138	0.0935635			0.289815	0.403032	0.30875	0.511714	0.376342	0.540098	0.579584	0.435503
465.527	0.0896896			0.284564	0.399829	0.30593	0.508943	0.37359	0.536913	0.576633	0.432565
473.915	0.0882054			0.281076	0.396405	0.304232	0.506215	0.372865	0.533956	0.573487	0.429645
482.304	0.0877745			0.278657	0.392838	0.301781	0.503079	0.371228	0.531152	0.570436	0.426575
490.693	0.0839042			0.274601	0.390001	0.298702	0.499933	0.370142	0.528026	0.56746	0.423653
499.081	0.0822667			0.272058	0.386082	0.297174	0.497291	0.368232	0.525041	0.5647	0.420502
507.47	0.0774184			0.268008	0.383381	0.29495	0.494077	0.366635	0.522544	0.561933	0.418165
515.858	0.0773006			0.264619	0.380594	0.292076	0.491496	0.36484	0.519948	0.559068	0.415278
524.247	0.0744919			0.26284	0.377699	0.290145	0.488808	0.363537	0.517015	0.556193	0.412534
532.636	0.0726958			0.259607	0.374949	0.289066	0.486519	0.36265	0.51469	0.553656	0.409799
541.024	0.0710176			0.256324	0.372331	0.287021	0.483603	0.361204	0.511814	0.550993	0.407258
549.413	0.0687515			0.253295	0.368444	0.284345	0.481025	0.360045	0.50935	0.548397	0.404811
557.802	0.0683332			0.250898	0.365616	0.284016	0.478424	0.35893	0.506695	0.545978	0.402071
566.19	0.0636151			0.247474	0.364092	0.281351	0.476066	0.358199	0.504346	0.543284	0.399784
574.579	0.0614522			0.2456	0.361105	0.279187	0.473864	0.357486	0.501884	0.540875	0.397567
582.967	0.0632976			0.242798	0.358665	0.277158	0.471281	0.355708	0.499662	0.538506	0.395322
591.356	0.0581009			0.240686	0.355149	0.275647	0.46867	0.354232	0.497231	0.535979	0.392832
599.745	0.0566256			0.237423	0.353352	0.273427	0.466984	0.353994	0.495339	0.533577	0.390756
608.133	0.0557924			0.236384	0.351102	0.271957	0.464386	0.352527	0.492543	0.53129	0.388237
616.522	0.0547149			0.232581	0.348516	0.271541	0.462129	0.351397	0.490754	0.528857	0.385892
624.91	0.0535797			0.23053	0.346231	0.268659	0.459853	0.35015	0.488471	0.526851	0.384097
633.299	0.0495348			0.228102	0.344353	0.268042	0.457585	0.349208	0.485972	0.524483	0.381907
641.688	0.0505891			0.225796	0.34154	0.265945	0.455761	0.348131	0.484111	0.5223	0.379792
650.076	0.0474964			0.224133	0.338181	0.265039	0.453799	0.346696	0.482199	0.520387	0.377644
658.465	0.0460968			0.222951	0.336948	0.263254	0.45127	0.345696	0.479808	0.518087	0.375496
666.853	0.0437626			0.219636	0.334143	0.262452	0.44958	0.344974	0.477704	0.515866	0.373758
679.436	0.0425597			0.217088	0.331162	0.260886	0.446583	0.343263	0.474472	0.512943	0.370812
696.214	0.0412964			0.212685	0.326599	0.25802	0.442467	0.341734	0.47095	0.508873	0.366972
712.991	0.0368957			0.2086	0.322217	0.256486	0.438731	0.339997	0.467014	0.504994	0.363143
729.768	0.0352223			0.205087	0.318963	0.254903	0.434945	0.338952	0.463153	0.501048	0.359506
746.545	0.0334607			0.202432	0.314603	0.252766	0.431585	0.336467	0.459587	0.497433	0.356248
763.322	0.0299329			0.198064	0.310167	0.251224	0.427841	0.334319	0.456265	0.493569	0.352754
780.1	0.0277915			0.194134	0.30743	0.249644	0.424576	0.332872	0.452729	0.490079	0.349411
796.877	0.0263803			0.191022	0.303664	0.247676	0.421278	0.331963	0.449231	0.486621	0.346308
813.654	0.0243737			0.187838	0.300498	0.246837	0.417811	0.329923	0.446099	0.483174	0.343103
830.431	0.0230359			0.185089	0.296914	0.245026	0.414711	0.328136	0.442951	0.480075	0.339997
847.208	0.0215408			0.181085	0.293488	0.243462	0.411634	0.327244	0.439581	0.47652	0.33732
863.986	0.0198393			0.178026	0.290072	0.240919	0.408597	0.325771	0.436803	0.47336	0.334306
880.763	0.0175591			0.175309	0.287354	0.240066	0.405629	0.324635	0.433538	0.470222	0.331391
897.54				0.171639	0.284352	0.238484	0.402688	0.323438	0.431166	0.467237	0.328743
914.317				0.168246	0.281029	0.236712	0.399781	0.322508	0.428154	0.464278	0.326281
931.095				0.166104	0.278441	0.235316	0.397108	0.3209	0.42575	0.461306	0.323612
947.872				0.163591	0.275725	0.232592	0.39418	0.319612	0.423082	0.458657	0.321052
964.649				0.160517	0.272284	0.230437	0.391615	0.318505	0.420356	0.455767	0.318521
981.426				0.158279	0.270263	0.228517	0.38912	0.317317	0.417906	0.452718	0.316004
998.203				0.155518	0.26689	0.226983	0.386269	0.315184	0.415457	0.449941	0.313616
1014.98				0.153422	0.264978	0.225585	0.384077	0.314579	0.413021	0.447355	0.311421
1031.76				0.151301	0.262468	0.224404	0.38181	0.313103	0.410646	0.444774	0.309054
1048.54				0.148338	0.259598	0.223435	0.379205	0.313168	0.408365	0.442431	0.30675
1065.31				0.145341	0.257322	0.221591	0.376946	0.310841	0.405805	0.43964	0.304602
1082.09				0.142639	0.254842	0.220494	0.374487	0.310213	0.40384	0.437302	0.302367
1098.87				0.140055	0.252398	0.219445	0.372254	0.308878	0.401638	0.434936	0.300282
1115.64				0.137179	0.250226	0.218678	0.37025	0.307419	0.3995	0.432537	0.298598
1132.42				0.134669	0.247696	0.21768	0.367559	0.307029	0.397178	0.430168	0.296368
1149.2				0.131803	0.245647	0.217159	0.365457	0.305421	0.39524	0.428014	0.294454
1165.98				0.128809	0.243478	0.215123	0.363386	0.303986	0.393075	0.425742	0.292404
1182.75				0.126706	0.241671	0.214216	0.361355	0.302704	0.391003	0.423483	0.290523
1199.53				0.124474	0.23894	0.212464	0.359104	0.301521	0.389048	0.421352	0.288825
1216.31				0.122984	0.237167	0.211893	0.357275	0.300738	0.386977	0.419096	0.286832
1233.08				0.120681	0.235424	0.211137	0.355041	0.300336	0.384924	0.416952	0.285191
1249.86				0.11761	0.233083	0.210236	0.35343	0.298537	0.382932	0.414882	0.283247
1266.64				0.116569	0.231633	0.209602	0.351041	0.297557	0.381215	0.413009	0.281716
1283.42				0.113914	0.230212	0.208649	0.349143	0.296612	0.378826	0.410794	0.280022
1300.19				0.112531	0.227953	0.207831	0.346954	0.295919	0.377038	0.409	0.27815
1316.97				0.111167	0.226205	0.20626	0.345328	0.294986	0.375262	0.406902	0.276642
1333.75				0.108803	0.224304	0.205294	0.343453	0.293563	0.373258	0.404817	0.274811
1358.91				0.10731	0.221669	0.203615	0.340911	0.292387	0.370687	0.402106	0.272642
1392.47				0.103946	0.218263	0.202437	0.337514	0.290321	0.367209	0.39849	0.269513
1426.02				0.0997489	0.214832	0.200868	0.334459	0.288382	0.363711	0.395133	0.26659
1459.58				0.0952468	0.211651	0.200404	0.331368	0.28672	0.360403	0.391601	0.263678
1493.13				0.0907693	0.208545	0.199642	0.328795	0.285015	0.357227	0.388239	0.260815
1526.69				0.086524	0.205857	0.198166	0.32604	0.282381	0.353913	0.384994	0.258055
1560.24				0.0807799	0.203236	0.196634	0.323063	0.281261	0.350874	0.381603	0.255439
1593.79				0.0754399	0.200341	0.19546	0.320014	0.279767	0.347797	0.378623	0.252998
1627.35				0.0717415	0.197717	0.19401	0.317091	0.277843	0.344879	0.375549	0.250455
1660.9				0.0677318	0.195306	0.192557	0.31421	0.276087	0.341947	0.372636	0.248214
1694.46				0.0638698	0.19277	0.191189	0.311659	0.273845	0.339174	0.369731	0.245879
1728.01				0.0605029	0.189503	0.190488	0.308847	0.271993	0.336389	0.36693	0.243713
1761.57				0.0565835	0.187804	0.189432	0.306045	0.270101	0.333426	0.364301	0.241369
624.91
633.299
641.688
650.076
658.465
666.853
679.436
696.214
712.991
729.768
746.545
763.322
780.1
796.877
813.654
830.431
847.208
863.986
880.763
897.54
914.317
931.095
947.872
964.649
981.426
998.203
1014.98
1031.76
1048.54
1065.31
1082.09
1098.87
1115.64
1132.42
1149.2
1165.98
1182.75
1199.53
1216.31
1233.08
1249.86
1266.64
1283.42
1300.19
1316.97
1333.75
1358.91
1392.47
1426.02
1459.58
1493.13
1526.69
1560.24
1593.79
1627.35
1660.9
1694.46
1728.01
1761.57

## Sheet: Figure3c-d
	Relaxation Time (s)
NF	140.3
allyl	102.1
C3-S-C2	73.98
C3-S-tBu	326.9
C3-S-C4	575.9
C3-S-C6	368.3
C3-S-Bz	1006
C3-S-C8	530.4
C3-S-Ad	1162
C3-S-C10	1367
C12	693.7

## Sheet: Figure3e-f
	NF	allyl	C3-S-C2	C3-S-C4	C3-S-tBu	C3-S-C6	C3-S-Bz	C3-S-C8	C3-S-Ad	C3-S-C10	C12
Time (s)	Creep Compliance (/Pa)	Creep Compliance (/Pa)	Creep Compliance (/Pa)	Creep Compliance (/Pa)	Creep Compliance (/Pa)	Creep Compliance (/Pa)	Creep Compliance (/Pa)	Creep Compliance (/Pa)	Creep Compliance (/Pa)	Creep Compliance (/Pa)	Creep Compliance (/Pa)
1.016	3.64489	2.61955	0.98449	1.18728	1.08458	0.950465	1.04534	1.28943	1.06498	1.11363	1.62299
2.004	3.96112	3.3772	1.46068	1.99697	1.75518	1.54312	1.65154	1.07876	1.78998	0.889795	1.23001
3	4.56096	3.94589	2.03218	1.9326	1.9363	1.64461	1.9911	1.27007	1.7776	1.03085	1.53381
4.004	4.66611	4.20746	2.06759	1.99049	2.17832	1.725	2.04687	1.40122	1.70646	1.09601	1.53698
5.004	4.83879	4.36557	2.10717	2.05206	2.16899	1.77782	2.0944	1.44587	1.78859	1.13434	1.6304
6	4.91775	4.44527	2.14236	2.09002	2.24302	1.85774	2.13699	1.46273	1.86326	1.15559	1.6902
7.004	5.02815	4.55017	2.19436	2.15328	2.27357	1.90531	2.1961	1.50904	1.8946	1.18442	1.73452
8.004	5.10055	4.63028	2.2264	2.18994	2.32187	1.96979	2.23469	1.54748	1.93236	1.20175	1.76177
9.008	5.1978	4.74207	2.27192	2.24335	2.35493	2.0087	2.29028	1.57102	1.95896	1.22611	1.8021
10.016	5.25755	4.84391	2.29897	2.2748	2.39684	2.06438	2.32275	1.60228	1.99194	1.24074	1.82909
11	5.3454	4.91216	2.33937	2.31883	2.42515	2.09846	2.37154	1.62071	2.01055	1.26218	1.86396
12.004	5.4	4.97502	2.36389	2.34626	2.4616	2.1448	2.40081	1.64139	2.04039	1.27465	1.88682
13.004	5.4808	5.064	2.39725	2.38551	2.4873	2.17639	2.4415	1.66801	2.05922	1.29366	1.92013
14.008	5.53395	5.1201	2.41943	2.4095	2.51945	2.21929	2.46744	1.68398	2.08415	1.30638	1.94084
15	5.60515	5.19895	2.45084	2.44686	2.54135	2.24728	2.50464	1.70887	2.10159	1.32215	1.97171
16.004	5.65175	5.2505	2.4697	2.47076	2.57167	2.28777	2.52861	1.72375	2.12757	1.33409	1.98941
17.012	5.71965	5.32685	2.49569	2.50427	2.59191	2.3134	2.56163	1.74767	2.14253	1.34983	2.01733
18.004	5.76115	5.37665	2.51422	2.52582	2.61984	2.35081	2.58426	1.76047	2.16508	1.35931	2.03627
19.016	5.82365	5.4507	2.54073	2.55855	2.63753	2.37392	2.61613	1.7827	2.18095	1.37576	2.05834
20.004	5.86525	5.4989	2.55574	2.57958	2.66597	2.41072	2.63596	1.79709	2.20171	1.38431	2.07801
21.004	5.92615	5.56515	2.58133	2.61051	2.68363	2.43562	2.66687	1.81632	2.2146	1.39918	2.10067
22.004	5.9654	5.6085	2.59827	2.63022	2.70918	2.46901	2.68598	1.82766	2.23593	1.40797	2.1174
23.004	6.0238	5.67265	2.62119	2.66061	2.72562	2.49085	2.7144	1.84705	2.2496	1.42113	2.14043
24.008	6.06165	5.71305	2.63802	2.67976	2.74912	2.52371	2.73346	1.85953	2.26843	1.42967	2.15389
25.004	6.11775	5.7732	2.66041	2.70649	2.76577	2.54461	2.76148	1.87719	2.27943	1.44343	2.17622
26.004	6.15405	5.81345	2.67469	2.72423	2.79043	2.57397	2.78011	1.88872	2.29915	1.45155	2.18905
27.008	6.2037	5.87235	2.69832	2.75055	2.80471	2.59469	2.80606	1.90615	2.31227	1.46332	2.20998
28.004	6.2376	5.9112	2.71298	2.76791	2.82674	2.62412	2.82322	1.91638	2.32877	1.47151	2.22364
29.004	6.2888	5.96975	2.73351	2.79217	2.84162	2.64131	2.84719	1.93131	2.33894	1.48311	2.24251
30.016	6.3219	6.00805	2.74658	2.80652	2.86536	2.66848	2.86501	1.94183	2.35549	1.49015	2.25506
31.004	6.3694	6.0622	2.76818	2.82977	2.87671	2.68703	2.88905	1.95719	2.36803	1.50866	2.2725
32.004	6.40225	6.0968	2.78089	2.84526	2.89915	2.71293	2.90456	1.96633	2.38308	1.52584	2.28564
33.004	6.4528	6.1481	2.79987	2.86749	2.91163	2.7302	2.92704	1.97946	2.39272	1.57009	2.30344
34.012	6.48295	6.182	2.81391	2.88177	2.93282	2.75721	2.94166	1.99074	2.409	1.5919	2.31522
35.004	6.52895	6.233	2.83295	2.90213	2.94421	2.77276	2.96337	2.00366	2.41813	1.62036	2.3326
36	6.5613	6.2813	2.84371	2.91717	2.96393	2.7977	2.97659	2.01635	2.43169	1.63265	2.34257
37.004	6.6074	6.3157	2.86219	2.93823	2.97479	2.81493	2.9984	2.02552	2.44199		2.36015
38.004	6.63675	6.34855	2.87347	2.95094	2.99329	2.83735	3.01269	2.03866	2.45497		2.36998
39	6.6792	6.39685	2.89007	2.97261	3.00387	2.8535	3.03102	2.04743	2.46406		2.38652
40.004	6.70865	6.4285	2.9002	2.98538	3.02197	2.8782	3.04408	2.05777	2.47881		2.39771
41.016	6.74885	6.47585	2.91815	3.00515	3.03385	2.89272	3.06391	2.06708	2.48716		2.41312
42.004	6.77715	6.5079	2.92838	3.01819	3.04865	2.91557	3.07379	2.09722	2.49886		2.42426
43	6.8194	6.55375	2.94312	3.03936	3.06083	2.93222	3.09482	2.10527	2.50704		2.43852
44.012	6.8456	6.5993	2.95361	3.05258	3.08556	2.95473	3.10636	2.13456	2.52016		2.44863
45	6.8861	6.629	2.96902	3.07063	3.10193	2.96922	3.124	2.14093	2.54014		2.46279
46.004	6.91285	6.65755	2.97783	3.08408	3.11132	2.99216	3.13576	2.16041	2.54911		2.47444
47.004	6.9533	6.6998	2.9928	3.10442	3.12772	3.00775	3.15474	2.17606	2.55978		2.48813
48.008	6.98025	6.7284	3.00331	3.1168	3.13666	3.02946	3.16504	2.21014	2.56804		2.49888
49.008	7.0193	6.77	3.01608	3.13468	3.15282	3.0436	3.18452	2.2426	2.57926		2.51304
50.004	7.0455	6.81125	3.02489	3.14901	3.16251	3.06352	3.19672	2.26449	2.58664		2.52217
51.016	7.08715	6.84	3.03986	3.16729	3.17731	3.07787	3.2128	2.27416	2.5991		2.54745
52.004	7.1138	6.8679	3.05001	3.17726	3.18782	3.09955	3.22505	2.30478	2.62322		2.56151
53.004	7.1508	6.90795	3.0622	3.19569	3.20008	3.11212	3.24301	2.34728	2.63499		2.5702
54.004	7.17675	6.937	3.072	3.2089	3.21129	3.13155	3.25404	2.37478	2.64162		2.5825
55.004	7.2162	6.9786	3.08581	3.22641	3.22334	3.14584	3.27	2.40774	2.65232		2.59367
56	7.23905	7.0176	3.09465	3.23708	3.23476	3.16482	3.28186	2.4605	2.66914		2.60642
57.012	7.2746	7.04405	3.10717	3.25388	3.24854	3.17713	3.29852	2.56854	2.73656		2.61407
58.016	7.29935	7.07185	3.11797	3.2659	3.25922	3.19734	3.30905	2.68121	2.7533		2.63732
59.008	7.3337	7.10915	3.13151	3.28267	3.30377	3.20987	3.32523	2.71948	2.77535		2.65051
60	7.35765	7.1348	3.13897	3.29169	3.31998	3.22746	3.33642		2.78451		2.65698
61	7.39235	7.17265	3.15271	3.30854	3.32915	3.2401	3.35226		2.79013		2.66974
62.016	7.4167	7.19795	3.16127	3.31872	3.34156	3.25956	3.37831		2.80118		2.67781
63.004	7.4528	7.23325	3.19557	3.33316	3.35148	3.27175	3.3893		2.8367		2.69064
64.008	7.47595	7.2577	3.20431	3.3443	3.3719	3.28872	3.40265		2.84455		2.71087
65.004	7.50995	7.296	3.21812	3.36019	3.38498	3.30051	3.41303		2.84995		2.71963
66.004	7.5351	7.3314	3.22591	3.38398	3.39318	3.31817	3.42785		2.87357		2.72983
67.016	7.57065	7.356	3.24622	3.39441	3.40613	3.3308	3.43872		2.88726		2.7391
68.004	7.5947	7.3909	3.2596	3.40974	3.43443	3.34923	3.45302		2.91427		2.74887
69.016	7.62865	7.41665	3.26857	3.41932	3.45403	3.36043	3.46247		2.92665		2.75829
70.012	7.65255	7.45235	3.2798	3.43329	3.46753	3.3774	3.4769		2.95268		2.76801
71.012	7.6861	7.47725	3.28616	3.44309	3.47443	3.38933	3.48615				2.77571
72.004	7.7083	7.50245	3.29924	3.45856	3.48522	3.40713	3.49832				2.80511
73.004	7.74265	7.5396	3.31783	3.46704	3.50298	3.41809	3.50612				2.81309
74.004	7.76405	7.57365	3.32646	3.48208	3.54188	3.43682	3.52122				2.82465
75.012	7.7944	7.59695	3.33914	3.49164	3.55868	3.44893	3.52812				2.83066
76.004	7.8175	7.62055	3.34571	3.50631	3.57655	3.46416	3.54306				2.84185
77.012	7.8496	7.65185	3.35635	3.51574	3.58276	3.47684	3.55181				2.86711
78.016	7.86945	7.67525	3.36375	3.52935	3.59499	3.49352	3.56361				2.88411
79.008	7.9019	7.70845	3.3927	3.53914	3.60051	3.50571	3.57224				2.89613
80	7.9228	7.7398	3.40024	3.55384	3.61212	3.52116	3.58501				2.92047
81.004	7.9555	7.76175	3.41078	3.5614	3.61892	3.53301	3.60504				2.92936
82.012	7.97785	7.7846	3.42727	3.57624	3.6361	3.5501	3.61409				2.95369
83.004	8.0103	7.8191	3.46764	3.58735	3.64512	3.5598	3.63495				2.96517
84.016	8.03155	7.83835	3.53066	3.59905	3.66318	3.57645	3.64807				2.98025
85	8.0641	7.87355	3.54155	3.60787	3.66873	3.58745	3.65646				2.98829
86	8.08625	7.8952	3.54697	3.62301	3.68031	3.60242	3.66895				3.01417
87.016	8.11905	7.92755	3.57097	3.63339	3.68689	3.61186	3.67638				3.02124
88.016	8.14035	7.9614	3.62262	3.64517	3.75358	3.62806	3.68894				3.03709
89.016	8.1715	7.9839	3.63902	3.65441	3.76862	3.639	3.70854				3.04847
90	8.19145	8.00495	3.65362	3.67052	3.78563	3.65476	3.71707				3.08665
91.016	8.22405	8.03825	3.6633	3.67872	3.79499	3.66507	3.73118				3.09524
92.004	8.24355	8.05925	3.70947	3.69122	3.82809	3.68005	3.73777				3.10079
93.004	8.27355	8.08915	3.71536	3.70201	3.84511	3.69051	3.75012				3.11213
94	8.2939	8.1212	3.72437	3.71564	3.85073	3.70573	3.75995				3.14146
95.004	8.32385	8.14215	3.72915	3.72417	3.89115	3.71448	3.77022				3.15809
96.012	8.34325	8.1635	3.7387	3.7361	3.90746	3.72988	3.777				3.17256
97	8.37385	8.1918	3.74498	3.74616	3.91499	3.74012	3.79093				3.19467
98.016	8.3945	8.223	3.76816	3.75918	3.92324	3.76406	3.79714				3.20126
99.004	8.42275	8.24325	3.78385	3.77894	3.92816	3.77893	3.81762				3.22298
100.004	8.4436	8.2655	3.84535	3.78797	3.93932	3.78945	3.83012				3.34709

## Sheet: Figure4c
C3-S-Ad	2 s	4 s	6 s	8 s	10 s	12 s	20 s	40 s	60 s	120 s
Time (s)	Stress (Pa)	Stress (Pa)	Stress (Pa)	Stress (Pa)	Stress (Pa)	Stress (Pa)	Stress (Pa)	Stress (Pa)	Stress (Pa)	Stress (Pa)
0	41.1729	32.4134	29.3112	26.6547	25.0369	23.6348	20.8088	19.7311	17.7698	12.236
0.000544	64.7592	57.9957	31.6405	29.248	27.3314	26.0442	46.0344	41.8782	39.9868	14.6702
0.00157	112.322	105.661	53.8912	51.97	49.3012	48.6187	92.6128	86.8658	85.0959	36.834
0.00259	153.361	148.284	100.527	97.6986	95.3203	95.2021	133.718	126.706	124.913	81.97
0.00362	170.617	167.881	143.029	137.401	137.454	136.769	152.454	145.797	143.899	121.847
0.00464	172.513	171.357	163.657	155.312	158.438	156.189	155.858	151.007	148.969	140.566
0.00566	170.335	169.22	168.663	159.426	164.08	159.828	154.255	151.456	149.124	145.043
0.00669	168.011	165.842	167.854	159.411	163.809	157.798	151.735	150.667	147.917	144.624
0.00771	166.289	162.483	165.203	158.691	161.339	154.372	148.959	149.128	146.034	142.905
0.00874	164.935	159.708	161.991	157.724	157.919	150.485	146.273	146.85	143.457	140.553
0.00976	163.123	157.378	158.752	155.95	154.429	146.408	144.091	144.117	140.372	137.749
0.010784	160.563	155.402	155.325	153.197	150.754	142.699	142.246	141.217	137.151	134.79
0.011808	157.593	154.07	151.958	149.844	147.316	139.731	140.297	138.215	133.92	131.871
0.012832	154.169	152.938	149.17	145.705	144.935	137.413	138.254	135.526	130.955	129.067
0.013856	150.164	151.13	147.071	140.77	143.206	135.638	136.013	133.65	128.57	126.565
0.01488	145.967	148.915	145.245	136.105	141.469	134.143	133.295	132.449	126.662	124.535
0.015904	142.021	146.103	143.455	132.196	139.851	132.675	130.157	131.477	125.012	122.808
0.016928	138.372	142.064	141.355	128.93	138.307	131.307	126.983	130.593	123.679	121.26
0.017952	135.905	137.285	138.212	126.598	136.099	129.938	123.681	129.666	122.65	119.956
0.018976	135.375	132.882	134.197	125.533	132.992	128.224	120.378	128.294	121.406	118.793
0.02	136.234	129.405	129.861	125.315	129.728	126.474	117.869	126.479	119.84	117.541
0.021024	138.002	126.945	125.082	125.179	126.448	125.296	116.542	124.439	118.16	116.25
0.022048	140.308	125.949	120.314	125.268	122.871	124.601	116.139	122.15	116.165	115.008
0.023072	142.272	126.092	116.177	125.479	119.262	124.25	116.513	119.55	113.843	113.59
0.024096	143.055	125.986	113.141	125.123	116.338	124.742	117.416	116.925	111.696	112.014
0.02512	142.838	125.471	111.071	124.323	114.152	126.164	118.091	114.362	109.894	110.651
0.026144	142.033	124.502	109.803	123.613	112.143	127.693	117.914	111.809	108.32	109.606
0.027168	140.399	122.123	109.105	122.638	110.661	128.957	117.034	109.555	107.095	108.716
0.028192	138.366	118.588	108.78	121.314	109.499	129.962	115.501	107.648	106.261	108.006
0.029216	136.912	114.925	108.821	120.387	107.8	130.053	113.374	105.557	105.466	107.294
0.03024	136.017	111.171	109.236	120.002	105.757	128.698	111.148	102.956	104.39	106.211
0.031264	135.427	107.709	109.801	119.845	103.462	126.406	109.082	100.03	103.148	104.778
0.032288	135.295	105.533	110.565	119.71	100.598	123.355	107.233	96.3819	101.585	103.145
0.033312	135.037	105.296	111.548	119.637	97.5401	119.5	106.011	91.8318	99.4876	101.233
0.034336	133.595	106.569	112.686	119.219	95.2903	115.206	105.555	86.9106	97.029	99.0319
0.03536	130.731	109.264	113.943	118.176	94.3662	110.935	105.17	82.1444	94.4141	96.6243
0.036384	126.421	112.959	115.687	116.382	94.9289	106.823	104.575	77.8246	91.6708	94.0513
0.037408	120.279	116.552	118.458	113.539	97.2156	103.091	103.686	74.5775	89.0317	91.2843
0.038432	112.604	119.158	121.61	109.696	101.083	99.6915	102.276	73.015	86.9202	88.5205
0.039456	105.039	120.643	124.456	105.639	105.467	96.0074	99.8927	72.9648	85.3215	86.0034
0.04048	95.0087	119.554	126.642	101.476	109.687	91.5716	95.268	75.6049	83.6056	83.6024
0.042016	86.7158	115.66	127.156	95.9036	114.129	83.7507	88.3999	82.3758	82.2677	80.2045
0.044064	88.1818	112.588	123.146	91.1607	115.527	72.9653	83.4251	90.1989	81.5351	76.0986
0.046112	96.7449	112.274	113.675	88.0873	112.313	67.9753	83.2546	96.4778	82.448	73.5245
0.04816	108.058	112.416	101.435	87.9794	106.517	73.5369	87.432	100.118	85.2465	74.0515
0.050208	119.392	110.104	90.0604	91.3813	101.042	89.2861	92.2476	101.388	88.4568	77.6282
0.052256	129.261	102.953	83.4506	96.5252	97.2794	106.317	94.7001	100.492	90.8549	82.4211
0.054304	137.473	93.4092	82.1684	101.371	92.1062	116.688	95.0658	95.5851	91.5914	86.5984
0.056352	139.398	90.8321	86.7495	106.208	84.2742	117.706	95.0828	86.7913	89.9182	88.2591
0.0584	128.332	97.7377	94.7321	109.457	79.2864	111.267	95.9051	76.5791	84.9209	86.3811
0.060448	107.376	106.124	103.934	107.807	83.1373	101.571	94.3998	69.6454	78.0162	81.4278
0.062496	87.1815	108.203	112.173	100.138	92.6791	89.4903	88.8265	71.628	74.0942	75.098
0.064544	77.0486	106.654	115.678	89.0831	100.879	76.7435	81.7123	81.0451	74.9848	69.6023
0.066592	81.2565	104.215	111.512	80.0879	104.616	69.672	78.6911	90.7272	79.0526	67.7687
0.06864	98.8043	101.379	99.4524	81.4156	102.359	74.2063	81.3915	95.5064	83.6873	71.3356
0.070688	120.646	97.976	82.977	90.9751	95.0115	87.5222	86.3117	94.219	85.1542	77.5157
0.072736	135.527	94.4166	73.3316	98.8779	84.6575	100.505	90.6357	88.2193	84.0457	81.7333
0.074784	135.265	94.644	78.9601	100.802	75.9868	108.002	93.0067	79.1826	82.4662	82.9147
0.076832	117.436	99.8346	94.4039	98.7514	76.2632	107.15	91.3965	70.3186	79.6557	81.9221
0.07888	94.7517	102.146	108.231	96.3145	86.7099	97.9186	85.9359	67.8981	75.4245	79.0801
0.080928	82.9216	102.083	113.151	93.1132	97.5036	81.118	79.7214	73.7178	72.5221	73.7166
0.082976	84.638	104.894	108.105	86.043	100.558	66.2095	77.6947	82.4518	73.5585	67.9506
0.085024	97.2644	107.36	96.5895	81.6165	97.8315	67.2129	81.731	88.9442	78.331	67.1908
0.087072	115.223	103.141	84.7826	85.4043	93.9074	83.4904	87.0797	91.4947	83.1378	71.8382
0.08912	130.075	93.6225	79.3174	92.5695	88.6155	101.329	89.3728	89.1104	85.59	77.665
0.091168	131.835	90.9519	84.9521	99.1198	80.0254	109.689	89.424	81.449	84.3454	81.9302
0.093216	117.632	98.3708	97.6585	104.828	76.8468	105.108	88.987	71.4603	78.7754	82.5871
0.095264	99.8345	106.43	108.647	104.604	85.9965	92.1795	88.1971	67.2747	72.4644	78.7552
0.097312	89.1331	110.698	111.65	94.7818	97.5255	76.638	86.0755	74.2792	70.4672	71.3635
0.09936	90.5347	111.134	106.524	81.0771	103.302	70.1083	84.5825	86.124	75.1147	66.4361
0.101408	103.782	106.189	96.3492	78.475	103.206	80.0061	84.5403	94.8141	83.1333	69.4591
0.103456	123.78	96.3727	85.4967	89.5829	97.434	96.7284	85.1014	94.9945	88.1351	76.8535
0.105504	138.374	94.3555	84.1693	102.676	86.1561	107.547	88.8244	87.2366	89.2364	82.1641
0.107552	132.442	105.744	95.1323	109.86	77.486	107.797	94.1155	76.5926	86.3658	83.509
0.1096	111.011	113.604	108.406	109.065	83.2919	99.1303	95.5891	72.0269	79.8161	81.0886
0.111648	92.6052	111.02	116.189	98.6202	97.6622	86.341	91.0307	79.031	74.0902	75.4672
0.113696	91.0383	107.926	113.924	84.9295	107.355	76.6335	85.9051	90.779	74.0517	70.7005
0.115744	108.182	107.823	102.918	83.3258	108.422	80.7824	85.7906	98.3707	80.5647	73.2154
0.117792	133.157	106.647	90.0864	96.5863	102.42	95.5903	89.8313	97.5299	88.9801	81.0961
0.11984	147.364	107.945	86.6971	110.918	90.8943	108.662	96.5011	88.8613	93.9575	87.25
0.121888	124.868	116.535	98.1293	116.402	81.5979	112.953	101.033	77.5732	89.4747	88.567
0.12496	96.6199	113.255	119.793	105.902	96.8659	102.181	93.7978	91.2161	83.4075	82.3298
0.129056	130.758	112.805	113.751	90.8685	114.793	85.1801	94.7647	103.474	92.0371	75.6252
0.133152	146.58	121.87	94.9497	114.326	99.4843	109.198	105.613	90.1082	96.7806	89.2012
0.137248	107.087	121.381	119.896	118.043	95.6474	117.942	102.15	90.5829	90.8166	93.2677
0.141344	124.125	121.425	127.74	100.024	117.466	94.1988	100.357	108.384	93.8975	83.007
0.14544	154.668	124.779	102.629	112.448	113.482	104.967	110.858	103.764	103.53	88.847
0.149536	124.218	129.684	118.301	127.727	100.949	126.059	112.827	94.1936	101.093	100.963
0.153632	120.453	128.605	137.412	113.747	120.453	107.991	107.592	111.357	98.9991	95.0205
0.157728	156.453	131.856	118.407	112.722	124.884	106.094	117.991	115.765	108.696	90.5441
0.161824	138.81	135.44	118.755	135.39	110.81	134.372	120.414	104.344	113.984	106.772
0.16592	123.282	137.001	143.923	127.95	122.733	123.091	114.992	114.067	106.704	107.251
0.170016	155.368	141.56	133.156	116.727	134.584	110.286	122.867	125.919	113.619	96.7173
0.174112	149.354	142.133	122.332	140.78	122.882	138.713	131.814	117.494	124.35	112.729
0.178208	126.566	140.671	148.281	140.488	126.931	136.024	125.416	119.723	117.051	118.786
0.182304	154.425	148.713	145.925	123.968	141.819	116.474	131.488	133.09	119.71	105.986
0.1864	157.392	147.338	130.229	143.51	134.449	144.975	139.887	129.216	133.635	117.242
0.190496	131.366	147.97	154.092	152.331	132.625	149.212	136.482	126.913	130.021	130.506
0.194592	151.637	155.76	154.893	133.583	149.14	125.983	138.665	144.033	129.195	117.657
0.198688	160.933	149.727	138.885	148.397	147.747	149.925	149.085	142.188	141.662	122.793
0.202784	132.12	154.869	156.56	164.121	139.619	161.414	146.418	134.807	141.797	140.909
0.20688	146.835	161.408	164.415	142.857	152.778	134.813	147.949	151.935	138.514	131.939
0.210976	167.356	151.458	147.228	149.344	159.182	153.873	157.496	154.81	150.557	130.617
0.215072	135.965	157.343	158.814	172.352	148.22	171.498	157.338	145.514	154.485	150.221
0.219168	142.93	165.452	171.468	152.557	158.785	145.641	157.511	159.76	147.579	145.402
0.223264	164.86	155.708	156.69	152.102	168.177	158.278	166.116	166.581	160.604	138.789
0.22736	140.276	159.099	159.529	178.406	155.172	181.74	168.802	156.682	167.925	159.756
0.231456	136.242	167.73	176.015	161.712	165.227	155.244	159.811	168.051	159.634	159.463
0.235552	159.207	155.776	163.008	156.902	173.443	162.817	175.011	178.721	168.998	150.371
0.239648	141.782	158.278	162.558	182.897	162.134	187.927	181.691	167.263	176.347	168.358
0.243744	137.155	169.773	176.481	167.567	169.303	164.486	171.717	176.546	173.605	172.773
0.24784	156.926	154.505	167.301	158.988	181.562	167.535	180.701	189.85	180.234	162.2
0.251936	142.133	160.285	164.716	186.816	168.705	195.06	190.002	178.192	186.273	177.245
0.256032	131.366	169.776	177.915	173.647	170.332	172.222	178.637	184.188	183.766	186.117
0.260128	153.403	152.143	169.447	161.235	185.7	171.715	187.524	199.043	189.023	176.643
0.264224	139.732	158.464	164.02	187.744	175.37	198.505	195.77	188.274	196.438	187.784
0.26832	127.553	167.84	178.437	177.403	171.829	177.186	186.73	192.247	195.241	196.892
0.272416	150.182	150.121	171.344	162.183	189.13	173.007	192.657	208.501	199.172	187.763
0.276512	142.165	157.152	162.165	188.785	178.643	203.298	203.847	200.081	206.069	196.458
0.280608	126.331	166.182	176.982	180.343	175.521	182.821	191.961	200.612	206.18	208.636
0.284704	140.868	151.067	169.608	162.187	189.036	173.298	202.728	212.571	211.62	202.099
0.290848	132.516	152.965	167.549	184.39	176.906	197.158	198.86	215.438	217.445	213.385
0.29904	129.487	157.099	164.741	174.1	185.346	189.771	206.455	213.467	224.146	216.198
0.307232	135.805	144.693	167.42	170.497	183.781	181.006	207.438	225.895	228.295	228.654
0.315424	128.869	145.991	163.006	182.355	175.125	196.616	202.941	225.627	233.178	232.772
0.323616	123.007	150.496	157.217	169.471	185.135	188.971	208.632	224.609	237.957	237.359
0.331808	132.18	137.828	161.046	166.437	179.675	180.711	208.786	234.867	240.648	249.068
0.34	125.508	139.634	155.86	176.485	171.696	193.581	204.193	231.896	243.401	249.723
0.348192	118.568	143.76	150.326	163.66	179.685	184.833	206.067	229.261	246.287	256.062
0.356384	128.524	132.118	152.899	159.865	174.521	176.408	205.729	238.643	247.561	265.482
0.364576	124.391	133.746	148.216	169.98	164.409	189.694	203.006	232.912	249.343	263.015
0.372768	113.614	138.152	141.97	156.216	174.52	178.898	200.765	230.334	250.155	269.865
0.38096	126.634	126.234	145.867	152.01	166.708	171.201	200.273	238.446	250.186	276.421
0.389152	121.662	128.017	141.668	163.099	157.593	181.958	198.344	231.89	250.604	271.952
0.397344	111.059	133.551	134.876	150.131	165.568	172.739	196.277	228.135	250.142	279.389
0.405536	125.019	121.846	139.096	144.576	159.33	164.619	195.233	236.047	249.934	282.146
0.413728	119.327	124.435	135.995	156.488	149.804	173.332	193.6	229.127	246.732	276.894
0.42192	108.261	128.083	129.847	144.801	158.835	166.776	190.616	224.743	249.348	281.949
0.430112	124.201	117.738	132.756	138.321	151.936	156.879	188.681	231.542	247.078	282.926
0.438304	116.989	122.119	131.924	150.474	142.784	165.395	187.732	225.957	244.137	277.264
0.446496	107.904	125.09	124.241	140.053	150.028	160.687	184.669	219.837	243.719	280.486
0.454688	121.747	113.655	128.761	133.168	145.749	147.631	182.749	226.865	242.25	280.987
0.46288	114.981	119.083	127.094	144.923	137.338	158.467	180.522	219.97	238.558	274.628
0.471072	106.873	123.65	120.681	134.864	142.638	154.105	177.99	215.686	239.485	277.014
0.479264	119.924	111.456	124.593	128.979	140.837	140.653	175.665	221.319	235.917	276.961
0.487456	114.597	116.616	124.46	140.48	131.307	150.034	173.571	214.943	233.558	270.504
0.495648	106.175	121.29	117.374	130.497	137.083	149.756	171.564	209.682	233.463	271.12
0.50384	116.855	109.609	121.83	124.865	136.063	135.344	168.22	215.642	230.2	272.82
0.512032	115.049	114.985	121.446	136.833	127.819	144.371	168.895	209.476	226.351	265.236
0.520224	104.818	119.945	114.48	127.245	131.825	144.98	162.368	205.208	229.227	264.733
0.528416	116.075	108.508	119.083	121.246	133.247	130.863	163.794	208.486	224.249	267.264
0.536608	115.152	112.591	120.447	135.122	123.732	139.255	161.578	203.733	223.263	260.765
0.5448	106.284	118.58	112.074	122.43	128.502	140.8	157.852	198.79	223.68	258.957
0.552992	112.781	108.172	117.781	119.229	130.413	128.064	156.859	202.803	219.134	261.303
0.561184	114.384	111.199	117.718	131.275	119.826	134.993	156.925	197.81	217.704	255.872
0.569376	104.176	117.657	110.34	121.143	125.123	137.066	151.206	193.216	218.841	254.689
0.577568	115.684	108.385	116.749	115.576	128.564	124.69	152.012	196.175	214.413	256.486
0.58576	111.099	108.476	115.809	129.942	116.836	131.053	149.535	192.426	211.567	251.053
0.593952	105.23	116.316	109.925	119.064	122.808	133.952	147.382	185.84	214.612	249.398
0.602144	113.979	107.949	114.948	114.459	126.605	123.054	147.872	190.402	210.045	250.806
0.610336	106.686	111.587	114.415	125.921	115.027	126.797	143.019	182.976	209.09	247.024
0.622624	113.277	107.281	111.286	115.739	122.473	126.15	141.66	181.976	203.942	244.877
0.639008	109.527	110.116	110.267	120.976	116.107	127.162	139.983	175.632	202.988	240.745
0.655392	104.715	109.238	112.356	116.012	117.839	120.583	135.669	171.045	198.7	239.307
0.671776	113.194	105.942	110.571	114.259	118.829	122.172	135.129	171.165	194.072	234.708
0.68816	109.091	108.116	108.418	117.778	112.846	123.24	133.158	164.16	192.654	231.581
0.704544	103.975	108.356	111.225	114.136	114.755	118.232	130.998	161.657	188.208	230.06
0.720928	113.226	104.168	109.178	112.016	114.86	118.445	129.769	161.608	184.749	224.656
0.737312	108.85	107.856	107.191	115.465	110.74	120.884	128.836	154.521	183.799	222.912
0.753696	103.992	106.904	110.26	112.19	112.875	115.59	127.641	154.276	178.025	220.698
0.77008	112.006	103.394	107.901	110.001	112.995	115.902	126.346	153.624	175.69	215.924
0.786464	108.775	106.902	105.935	113.729	107.972	118.596	126.236	147.486	174.479	215.506
0.802848	102.946	106.552	108.88	109.803	111.084	113.391	124.421	148.034	167.779	213.426
0.819232	111.415	102.788	106.507	109.221	111.66	114.538	123.692	147.224	168.225	208.823
0.835616	109.141	106.137	105.114	112.236	106.171	116.205	124.04	141.851	166.809	208.424
0.852	102.17	105.823	107.628	108.472	109.534	112.199	121.532	142.062	161.118	206.186
0.868384	111.473	102.491	105.857	107.232	110.141	111.975	122.205	141.753	162.186	201.758
0.884768	108.163	104.984	104.006	111.063	104.685	114.438	121.804	137.026	160.5	201.924
0.901152	101.92	105.525	107.185	107.224	107.783	111.725	119.205	138.485	155.085	199.032
0.917536	110.542	101.843	105.306	105.564	108.246	110.518	120.814	136.987	156.233	194.701
0.93392	107.917	104.444	103.463	109.717	103.829	113.308	119.595	133.054	155.25	195.212
0.950304	101.589	104.892	106.513	106.664	106.436	109.886	117.328	134.846	149.645	192.534
0.966688	110.004	101.424	105.236	104.653	107.816	110.306	119.069	133.043	151.805	187.546
0.983072	107.26	104.078	102.731	108.367	102.837	112.006	117.943	129.977	151.045	187.989
0.999456	101.909	104.558	106.504	105.388	105.648	108.405	115.905	131.57	145.784	186.475
1.01584	109.895	100.855	104.439	104.451	106.8	108.847	117.029	130.398	147.435	181.085
1.03222	106.798	103.264	102.101	106.976	102.116	111.271	117.143	126.4	147.029	182.509
1.04861	102.591	103.625	106.614	104.875	105.089	107.237	113.861	128.962	141.789	180.228
1.06499	109.606	100.748	103.513	103.283	106.135	107.669	116.093	127.354	143.587	176.363
1.08138	106.185	102.574	102.034	106.417	101.411	110.654	115.769	124.203	142.418	177.407
1.09776	102.967	103.058	106.084	104.342	104.485	106.809	112.825	126.692	137.952	175.075
1.11414	109.845	100.85	103.207	102.541	105.684	107.368	115.108	125.113	139.985	171.716
1.13053	105.998	102.464	101.985	106.114	100.541	108.657	114.454	122.519	140.179	173.24
1.14691	102.809	102.73	105.262	103.64	104.481	105.477	111.726	125.19	134.854	170.451
1.1633	109.747	100.586	102.85	102.157	104.706	107.115	114.676	123.717	137.536	166.965
1.17968	105.853	102.77	101.438	105.627	99.8946	108.184	112.843	121.098	137.628	170.13
1.19606	103.216	102.909	104.932	103.171	103.949	105.291	111.113	123.436	132.984	166.098
1.21245	108.795	100.028	102.157	102.08	103.941	106.133	113.356	122.301	135.754	162.954
1.22883	105.628	102.979	101.548	105.267	99.8114	108.475	111.996	119.186	134.861	165.693
1.24522	104.172	102.396	104.13	102.282	103.34	104.672	110.563	121.677	131.531	161.9
1.2616	107.055	101.277	101.542	102.143	103.917	104.589	111.77	119.743	133.709	159.843
1.28618	106.168	100.478	102.426	103.361	100.842	106.461	111.06	120.308	131.68	159.766
1.31894	104.814	102.082	101.028	102.691	101.441	106.239	109.828	118.455	130.262	156.873
1.35171	106.957	100.864	102.315	102.188	102.426	103.43	110.658	118.067	130.643	153.115
1.38448	105.573	100.266	101.966	102.534	99.8257	105.862	109.903	118.347	128.792	151.547
1.41725	104.866	101.863	100.755	102.126	100.045	105.103	108.555	116.579	127.346	150.104
1.45002	106.031	100.517	101.94	100.726	101.614	103.155	109.552	115.681	127.662	146.124
1.48278	106.107	100.227	101.752	101.923	99.2902	105.775	108.136	116.062	126.044	145.468
1.51555	104.899	101.778	100.479	101.602	99.0631	104.915	107.256	114.625	124.967	144.343
1.54832	105.585	100.189	101.59	100.507	101.466	102.505	107.956	114.059	125.951	141.088
1.58109	105.863	99.7941	101.203	101.496	99.4303	105.252	107.338	114.977	124.105	141.516
1.61386	103.887	101.353	100.2	101.388	99.0288	103.909	106.165	113.298	123.453	141.065
1.64662	105.526	100.421	100.551	100.799	101.048	102.067	107.385	112.902	124.053	138.627
1.67939	105.103	100.056	101.011	101.104	99.0185	104.161	106.406	113.649	122.726	138.914
1.71216	104.423	102.362	100.072	100.999	98.6198	103.769	105.728	112.238	122.501	138.924
1.74493	105.905	100.707	99.8032	100.387	100.146	102.024	106.016	111.568	123.417	137.011
1.7777	105.276	100.392	100.33	100.467	98.8055	103.742	105.817	112.23	122.114	136.931
1.81046	105.386	101.59	99.3178	100.825	98.3904	103.537	104.667	111.089	121.595	136.994
1.84323	105.452	100.426	99.8142	99.9911	100.502	101.839	105.207	110.25	122.13	134.488
1.876	105.486	100.387	100.063	100.89	98.5453	103.407	104.949	111.006	120.576	134.798
1.90877	104.78	101.637	98.8527	101.036	98.1329	103.281	103.571	110.176	120.113	135.049
1.94154	105.272	100.05	100.198	100.81	100.16	101.935	104.228	109.767	120.574	132.257
1.9743	105.414	100.037	99.5168	101.163	97.8832	103.266	104.265	110.115	120.028	133.044
2.00707	104.941	100.726	98.7772	101.14	97.9669	102.936	102.819	109.641	119.412	133.026
2.03984	105.774	99.8036	99.8571	100.323	99.4438	101.968	103.686	109.122	119.787	130.598
2.07261	105.129	99.9924	99.0643	100.649	97.4355	103.04	103.764	110.017	118.375	131.176
2.10538	105	100.725	98.4982	100.546	98.023	103.246	102.049	109.557	117.563	131.301
2.13814	105.336	100.342	100.077	100.069	99.3798	102.413	103.252	109.297	117.848	129.06
2.17091	104.599	99.9407	99.4904	100.404	97.7221	102.414	103.548	109.588	116.358	128.431
2.20368	104.774	100.566	98.2507	100.488	97.4605	102.868	102.16	108.948	115.866	129.604
2.23645	105.125	100.274	99.7715	100.132	98.9067	102.074	102.817	108.407	116.072	127.057
2.26922	104.797	99.5512	99.5112	100.201	98.0034	101.91	103.602	108.361	115.825	127.406
2.30198	104.387	100.549	98.2274	99.9512	97.6179	102.259	101.791	108.125	115.58	128.686
2.33475	105.902	100.306	99.6639	99.5376	99.2977	100.815	102.965	107.605	116.206	127.241
2.36752	105.374	99.9475	99.7592	99.9129	98.5703	101.79	103.401	108.216	115.584	127.482
2.40029	104.739	100.638	98.0118	99.826	98.3087	102.101	102.093	107.631	114.522	128.644
2.43306	106.19	100.046	99.4046	99.0656	99.195	101.125	103.181	107.728	115.31	126.604
2.46582	105.629	99.4767	99.2186	99.6125	98.3601	101.58	103.323	108.32	114.701	127.107
2.49859	105.155	100.768	97.4535	99.1964	97.8951	101.561	102.01	107.346	114.034	128.181
2.53136	106.711	99.8168	99.1241	98.8468	98.8406	101.177	102.743	106.947	114.63	124.913
2.56413	105.579	100.04	99.4059	98.6448	98.054	101.069	102.447	106.649	114.02	125.673
2.61328	105.912	99.6771	98.3531	98.6124	98.0932	101.403	102.759	106.615	114.005	125.411
2.67882	105.387	100.263	98.5969	98.4971	97.4408	101.363	102.392	105.509	113.307	125.301
2.74435	104.866	99.8582	98.6979	98.2355	97.5697	100.495	102.322	106.485	112.739	123.378
2.80989	105.214	99.4948	98.4227	98.2385	97.7877	100.283	101.671	106.309	112.804	123.97
2.87542	104.64	99.7734	98.6841	97.7077	97.5241	100.635	100.98	104.875	112.209	123.894
2.94096	104.253	99.312	99.0132	97.4114	98.0639	100.088	100.95	105.296	111.772	122.383
3.0065	104.374	99.288	98.3804	97.171	97.6818	100.182	100.931	104.092	112.005	122.328
3.07203	103.918	99.7805	98.5839	97.5326	97.2492	99.9509	100.163	103.183	111.044	121.368
3.13757	103.792	99.1163	99.0581	97.4216	97.9418	99.4879	100.409	103.8	111.076	120.624
3.2031	104.383	98.839	98.5769	97.4134	97.6862	99.771	100.512	103.03	111.114	120.713
3.26864	104.011	99.3959	98.6455	97.6531	97.7101	99.7333	99.8337	103.068	110.584	120.599
3.33418	103.863	98.8009	99.1382	96.7922	98.0244	98.9444	100.293	103.618	110.772	119.128
3.39971	103.843	98.648	98.6641	96.9368	97.7865	99.2685	99.7849	102.713	110.614	118.504
3.46525	103.916	99.1675	98.5235	97.1814	97.5784	99.3561	99.4178	102.152	110.05	118.19
3.53078	104.139	98.4754	99.1759	96.8977	97.6038	98.8784	99.7539	102.416	109.888	117.477
3.59632	105.024	98.9889	98.0813	97.1333	97.3671	99.0125	99.5343	102.354	109.837	117.781
3.66186	104.714	99.7256	98.1265	97.6229	97.378	99.0189	98.975	102.312	108.979	117.262
3.72739	104.6	98.9899	98.7999	97.3386	97.6668	98.4676	98.8857	103.039	109.205	115.956
3.79293	104.813	99.4721	98.1155	97.3764	97.6142	99.0038	98.6068	102.597	109.377	116.076
3.85846	104.279	100.078	98.0127	97.4017	97.3714	98.9233	98.2972	102.445	108.184	115.372
3.924	104.491	99.357	98.7142	97.2633	97.7185	98.709	98.6652	102.668	108.305	114.986
3.98954	104.466	99.2178	97.8689	97.6564	97.4364	98.8511	98.4774	101.776	108.542	115.059
4.05507	104.336	99.8076	98.0303	97.6914	97.2358	98.9621	97.6655	101.23	108.409	114.739
4.12061	103.959	98.9637	98.8077	97.3534	97.4111	98.573	98.2224	102.577	108.739	114.712
4.18614	104.165	99.2214	98.1818	97.4538	96.9246	98.542	97.962	101.992	108.645	114.996
4.25168	103.448	99.592	98.5848	97.764	96.5402	98.7207	97.52	101.732	107.953	113.985
4.31722	103.899	98.8039	98.1796	97.2106	97.0998	98.2868	97.937	102.709	108.005	113.262
4.38275	104.353	99.2373	97.4944	97.7194	96.8169	98.1419	97.3584	102.002	107.752	114.655
4.44829	104.135	99.4101	97.7294	97.5345	96.9809	98.0438	97.3478	101.753	107.156	114.308
4.51382	103.99	98.3028	97.7715	97.1707	97.2411	97.9908	97.9704	102.05	107.257	113.83
4.57936	103.997	98.4978	97.3566	97.7803	96.9573	98.2687	97.0254	101.015	107.106	113.815
4.6449	103.837	98.52	97.3668	97.5877	96.4049	98.2952	96.9451	100.677	106.788	113.16
4.71043	103.596	98.1394	97.1281	97.0451	96.2348	97.8329	97.9935	101.072	107.044	113.154
4.77597	103.411	98.8689	96.9968	97.7481	95.8656	97.8927	97.6809	100.332	106.737	113.401
4.8415	103.447	98.9858	97.6097	97.3073	95.5187	98.1911	97.3034	100.439	106.33	112.759
4.90704	104.039	98.6404	97.6218	97.0115	96.2634	97.8227	97.9264	100.396	106.804	112.275
4.97258	104.056	98.8973	97.0861	97.3301	95.7625	98.2192	97.3788	100.205	106.646	112.02
5.03811	104.268	98.362	97.1295	96.5778	95.731	98.1656	97.6447	100.118	106	111.3
5.10365	104.606	97.7841	97.1359	96.7525	96.3903	98.0759	97.8522	100.337	106.411	111.642
5.16918	104.609	97.8498	97.2805	97.2385	96.0173	98.3555	97.0408	100.14	105.571	111.488
5.26749	104.54	97.9453	98.0068	96.6057	96.4	97.7761	97.202	99.9754	105.777	111.231
5.39856	104.864	98.1016	97.8947	96.7485	96.0047	97.7564	97.192	99.5472	105.727	110.965
5.52963	104.552	98.5957	97.6691	97.4387	95.7873	97.7662	97.0669	98.9589	105.3	110.718
5.6607	104.398	98.5985	97.8386	96.9495	95.7529	97.5266	96.7449	98.6745	105.263	110.124
5.79178	104.08	98.786	97.987	97.3741	95.4746	97.498	96.8994	98.9466	104.663	110.122
5.92285	104.285	99.4731	97.7779	97.5721	95.4387	97.3713	97.1468	98.6007	104.349	109.951
6.05392	104.304	99.1479	97.8866	97.345	95.9594	97.1348	97.2424	98.3761	104.698	109.133
6.18499	104.131	98.7865	97.7967	97.757	95.8964	96.593	97.1991	98.3101	104.629	109.587
6.31606	103.956	99.2802	98.132	97.681	95.7309	96.8856	96.915	98.0288	104.099	109.397
6.44714	104.471	99.3371	98.5174	97.0402	96.0772	96.6894	96.6136	97.8591	103.837	108.783
6.57821	104.862	99.1664	98.1415	96.5757	95.8284	97.1406	96.648	98.0782	103.787	108.575
6.70928	104.622	98.8159	97.701	96.6835	95.5376	96.5991	96.4287	98.1047	103.466	108.421
6.84035	104.86	98.3745	98.0294	96.3954	95.7054	96.4378	96.6149	97.9623	103.102	108.138
6.97142	105.269	98.4235	97.8435	96.6323	95.4538	96.4086	96.9991	98.3242	103.124	108.083
7.1025	105.234	98.6504	98.0291	96.6962	95.2734	96.452	97.1444	98.0242	102.801	107.689
7.23357	104.937	98.5992	98.2864	96.2993	95.6678	96.1032	97.0967	97.7061	102.555	107.041
7.36464	105.014	98.5496	98.1693	95.7438	95.7776	96.1743	96.7749	97.8501	102.563	107.354
7.49571	104.996	98.8742	98.3323	96.1837	95.6781	96.43	96.3818	98.2822	102.141	107.103
7.62678	104.729	98.6236	98.2773	96.0152	95.9044	95.9338	96.605	98.2744	102.091	106.133
7.75786	104.628	98.5217	98.6782	96.0413	95.7308	95.6513	96.844	98.2789	101.773	105.984
7.88893	104.436	99.0674	98.4167	96.2703	95.6103	96.0845	96.3803	98.161	100.87	105.852
8.02	103.889	99.46	98.4171	96.039	95.9215	96.3711	96.3418	98.169	100.611	105.092
8.15107	103.64	99.1499	98.41	95.8868	95.9271	95.9178	96.5534	98.4694	100.824	104.275
8.28214	103.735	99.2023	97.6823	96.3123	95.5888	95.9524	96.4969	98.3915	100.739	104.298
8.41322	103.469	99.4136	97.8516	96.2135	95.7454	96.0525	95.8801	97.8279	100.516	104.195
8.54429	103.752	98.9185	97.9786	95.6531	95.6805	96.0907	95.8114	97.7754	100.717	104.111
8.67536	103.437	98.8314	97.7967	95.7349	95.4718	96.6104	95.7858	97.8892	100.567	104.763
8.80643	102.948	98.6683	97.8034	95.9765	95.8053	96.8268	95.3212	97.3841	100.002	104.67
8.9375	102.984	98.6145	97.6643	95.8232	95.9449	96.6706	95.7281	97.0727	100.391	103.946
9.06858	102.993	98.5181	97.9766	95.7619	95.7899	96.7911	95.3922	97.2603	100.597	103.951
9.19965	103.086	98.7027	98.0232	95.8001	95.6029	96.7963	94.8425	96.9745	100.604	103.768
9.33072	103.417	98.8192	98.282	95.6483	95.5715	96.2414	95.1063	96.7514	100.605	103.177
9.46179	103.722	98.3552	98.2357	95.4499	95.3699	95.8765	95.1189	97.0596	100.19	103.659
9.59286	103.658	98.2849	97.7179	95.6803	95.3052	96.1811	94.6808	96.4506	100.036	103.321
9.72394	103.509	98.3376	97.6474	95.7824	95.4868	96.2668	94.9862	96.404	100.083	103.07
9.85501	103.496	99.0058	97.6793	96.0884	95.4011	96.1534	94.9446	96.9984	99.7144	103.333
9.98608	103.402	99.3994	98.0253	96.1257	95.3445	96.5954	94.566	97.185	99.6779	102.8
10.1172	103.051	98.7255	98.3478	95.8823	95.206	96.5638	94.6473	96.7357	99.8309	102.683
10.2482	103.115	98.3323	98.1229	95.7679	95.2072	96.4022	95.0932	96.4323	99.6814	102.157
10.3793	103.229	98.3842	97.7072	95.9619	95.17	96.3354	94.6222	96.2366	99.2784	102.128
10.5759	103.248	98.5397	97.5855	95.9175	95.2089	96.0545	94.1558	96.1071	99.237	101.543
10.838	103.216	98.4632	97.473	95.8179	94.8914	96.0863	94.3709	95.8798	98.9443	101.474
11.1002	103.496	98.6298	97.6897	96.0126	94.8395	95.4802	94.7477	96.0752	98.4479	100.961
11.3623	103.492	98.3851	97.577	95.8056	94.4482	95.334	94.9981	95.5508	98.2124	100.674
11.6245	102.859	98.5118	97.5638	96.3384	94.2751	95.5385	95.2425	95.4332	98.0462	99.4761
11.8866	103.034	98.9706	97.8466	96.4177	94.9903	95.5244	95.3132	95.2602	97.6733	99.8784
12.1488	102.867	98.9739	97.4591	96.3282	95.1048	95.9935	95.0255	95.3139	97.516	99.4839
12.4109	102.327	98.8923	97.418	96.3613	95.044	96.0045	95.1397	95.9236	97.6195	98.667
12.6731	102.516	98.5885	97.6812	96.5189	95.1811	95.5276	95.271	95.9076	97.877	98.2761
12.9352	102.742	98.4138	97.8016	96.6625	95.0145	95.8178	95.9163	96.1114	97.483	98.1106
13.1973	102.302	98.2176	97.5274	96.6655	94.5322	95.7154	95.8323	95.9039	96.9055	97.7484
13.4595	102.281	97.799	97.3617	96.0688	93.8813	95.7249	95.608	95.7517	97.5473	97.9237
13.7216	102.312	97.7402	97.4204	96.3269	93.912	96.0834	95.4932	95.7383	97.3219	97.9312
13.9838	102.436	97.5148	97.7433	96.1299	94.4464	95.9354	95.082	95.917	97.5686	97.9426
14.2459	102.843	97.5138	97.7117	96.0615	94.4683	95.6318	95.4166	95.3801	98.1819	98.0682
14.5081	103.179	98.0499	97.2246	96.2422	94.3449	95.7824	95.1138	95.2077	97.5608	98.6266
14.7702	102.709	98.3226	97.4126	96.3048	94.3092	95.4829	94.5702	95.4818	97.0527	98.2539
15.0324	102.967	97.8544	97.2752	96.1757	94.1409	95.5165	94.495	95.5985	96.8862	97.7139
15.2945	102.178	98.3803	97.6017	95.9254	93.9865	95.2736	94.615	95.4777	96.5846	97.5352
15.5566	102.294	98.5513	97.7844	95.844	94.2812	94.6632	94.5793	95.4214	96.9045	97.1516
15.8188	102.329	98.574	97.9719	95.6288	94.1049	94.5383	94.1186	95.4713	96.5198	96.9282
16.0809	102.215	98.6898	97.9491	95.6354	94.0198	94.6058	94.1645	95.1327	96.1769	96.9097
16.3431	102.075	98.9137	98.0063	95.4899	94.2527	95.0922	94.6064	95.4988	96.2129	96.475
16.6052	101.883	98.9448	98.5646	95.778	94.5756	95.2558	94.6339	95.7567	96.5482	96.1764
16.8674	101.571	99.1154	98.6497	96.1319	94.4818	95.1123	94.6436	95.7012	96.0658	95.9354
17.1295	101.58	99.3017	98.2939	96.1056	94.4085	94.9814	94.1955	95.8273	96.472	95.1484
17.3916	101.655	99.0146	98.3306	95.976	94.3393	94.9487	94.2761	95.6948	96.1127	95.29
17.6538	102.145	99.0098	98.3393	96.1918	94.8491	94.8373	94.3672	96.1591	95.8965	94.9472
17.9159	102.582	98.5182	98.3811	96.131	95.2238	94.7279	94.0624	95.8809	95.7935	94.3208
18.1781	102.491	97.8197	97.8944	95.9173	94.9499	94.5178	94.0222	95.8933	95.6366	95.038
18.4402	102.892	98.314	98.0347	95.9931	95.4054	94.2547	94.1136	95.6132	95.9649	95.0105
18.7024	102.851	98.5482	97.8871	96.0415	95.3368	94.4062	94.1623	95.7061	95.5311	94.974
18.9645	103.007	98.8225	97.9382	95.5006	95.3505	94.7051	94.1518	95.6399	95.5058	95.1533
19.2267	103.451	99.3151	97.9153	95.3816	95.5931	94.5335	94.3347	95.5844	95.7772	95.0345
19.4888	102.81	99.2958	97.6572	95.909	95.6221	94.977	94.4928	95.6977	95.3842	95.1676
19.7509	102.541	98.8525	97.403	95.6264	95.1748	95.0452	94.3793	95.176	95.1155	95.216
20.0131	102.589	99.0573	97.6626	95.6518	95.0417	94.814	94.0878	95.6267	95.4939	95.0495
20.2752	102.142	99.3923	97.5552	95.9036	94.7769	95.1252	93.9508	95.576	95.4094	95.294
20.5374	102.249	99.659	97.5385	96.0272	94.7225	94.9013	94.3609	95.3795	95.2919	95.4027
20.7995	101.949	99.8016	97.7506	96.4463	94.7448	95.1028	94.7405	95.0958	94.708	95.1895
21.1927	101.525	99.6644	97.2758	95.7437	95.0135	95.4224	94.8029	95.4698	94.273	94.5846
21.717	101.064	99.0246	97.0592	95.4316	95.0177	94.88	94.5179	95.3536	94.1051	94.5094
22.2413	101.042	98.9149	97.0557	96.2449	95.7004	94.9311	94.4995	95.8778	94.0413	94.5864
22.7656	100.867	99.3248	97.1821	96.7864	95.5546	94.6344	94.2877	95.3887	94.0991	94.3539
23.2899	100.951	99.5651	97.2056	96.5628	95.5212	95.1049	94.2853	95.1641	94.1072	93.8808
23.8142	100.978	99.6151	97.1082	96.5096	95.5234	95.152	94.6759	95.1639	93.8584	93.6684
24.3385	101.235	99.2789	96.8158	96.2612	95.7606	95.2413	94.7598	95.1219	93.9416	93.7898
24.8628	101.612	99.1827	96.746	95.7959	96.3005	95.2913	94.686	94.9743	93.9116	93.2551
25.387	101.844	98.9761	96.4107	95.7721	96.5116	95.364	94.1796	94.5399	93.8176	93.5617
25.9113	102.579	98.6981	96.441	95.6931	96.2373	95.2782	94.3767	94.0511	93.9171	93.2856
26.4356	102.263	98.8745	96.4056	95.8481	96.2398	94.9538	94.2969	93.6767	94.1999	92.6567
26.9599	101.875	99.0688	96.3503	95.7006	96.0217	95.0066	94.5542	93.6257	94.1546	92.8882
27.4842	102.516	98.4897	96.4757	94.9584	96.4501	94.9165	94.7189	93.6939	93.8741	92.8909
28.0085	102.34	98.6461	96.7961	94.5101	96.1186	94.8968	94.3307	93.8359	93.5623	92.8647
28.5328	102.235	98.1162	96.6667	94.7393	95.8562	95.3082	94.371	94.2738	93.6843	92.5924
29.0571	101.771	98.1584	97.0553	94.1085	96.0182	94.732	93.9094	94.0788	93.419	92.2258
29.5813			96.9236	94.497	95.3335	95.0159				92.7279

## Sheet: Figure4d-e
	Recovery Time (s)
NF	34.8918
allyl	34.459
C3-S-C2	31.8167
C3-S-tBu	32.7761
C3-S-C4	38.0662
C3-S-C6	38.8199
C3-S-Bz	34.1297
C3-S-C8	64.6412
C3-S-Ad	37.3274
C3-S-C10	55.7414
C12	65.6168

## Sheet: Figure5b
	Diffusivity (um2/s)	stdev (n=3)
NF	3.64642	0.640848
Allyl	4.34819	0.266221		For PBS:
C2	4.53416	1.29955		Stokes Einstiein		m2/s	um2/s
C4	3.94092	0.580173		D = k*T/6*pi*n*R		7.23961e-11	72.3961
tBu	3.3106	0.749236		Kb (M2*kg/s2K)	1.38065e-23
C6	3.65908	0.916092		RH (BSA) A	3.4e-09
Bz	3.82466	0.639199		n (viscosity PBS (mPa s)	0.0008872
Ad	2.48492	0.986016		T (K)	298.15
C8	2.55408	0.404264
C10	2.57663	0.884526
C12	2.16242	0.28077

## Sheet: Figure 5c
	NF			allyl			C3-S-C2			C3-S-C4			C3-S-tBu			C3-S-C6			C3-S-Bz			C3-S-C8			C3-S-C10			C3-S-Ad			C12
Time (days)	Cumulative BSA released (%)	Cumulative BSA released (%)	Cumulative BSA released (%)	Cumulative BSA released (%)	Cumulative BSA released (%)	Cumulative BSA released (%)	Cumulative BSA released (%)	Cumulative BSA released (%)	Cumulative BSA released (%)	Cumulative BSA released (%)	Cumulative BSA released (%)	Cumulative BSA released (%)	Cumulative BSA released (%)	Cumulative BSA released (%)	Cumulative BSA released (%)	Cumulative BSA released (%)	Cumulative BSA released (%)	Cumulative BSA released (%)	Cumulative BSA released (%)	Cumulative BSA released (%)	Cumulative BSA released (%)	Cumulative BSA released (%)	Cumulative BSA released (%)	Cumulative BSA released (%)	Cumulative BSA released (%)	Cumulative BSA released (%)	Cumulative BSA released (%)	Cumulative BSA released (%)	Cumulative BSA released (%)	Cumulative BSA released (%)	Cumulative BSA released (%)	Cumulative BSA released (%)	Cumulative BSA released (%)
0	0	0	0	0	0	0	0	0	0	0	0	0	0	0	0	0	0	0	0	0	0	0	0	0	0	0	0	0	0	0	0	0	0
0.125	2.83	2.7	2.86	3.08	3.46	3.42	2.91	3.34	2.89	2.95	2.4	3.45	3.35	3.05	2.95	2.7	2.57	2.77	2.96	2.5	2.25	2.3	1.21	1.8	2.81	2.42	2.94	2.22	2.42	3.91	3.44	2.75	2.77
0.25	4.2	3.75	4.07	4.73	5.02	5.18	4.13	4.44	4.21	4.2	3.54	4.46	4.67	4.37	4.39	3.93	3.57	3.91	4.33	3.79	3.45	3.41	2.3	2.83	3.99	3.6	4.4	3.48	3.58	5.14	4.69	3.81	4.1
0.5	5.81	5.26	5.43	6.6	6.51	7.08	5.54	5.37	5.78	5.77	4.94	5.52	6.05	5.85	5.8	5.29	4.8	5.26	5.72	5.12	4.88	4.87	3.31	3.81	5.61	5.15	6.07	4.79	5.19	6.17	6.14	5.18	5.53
1	8.07	7.08	7.64	8.99	8.62	9.64	7.77	7.09	8.14	8.02	7.09	7.33	8.32	8.01	7.95	7.81	7.31	7.53	8.38	7.33	6.78	7.08	6	6.1	7.9	7.8	8.19	7.5	7.56	8.01	8.15	7.15	7.79
2	10.72	9.3	10.92	11.65	11.19	12.71	10.65	9.83	11.05	11.43	9.74	10.1	10.91	11.03	10.61	10.75	9.86	10.49	10.97	10	9.45	9.81	8.83	9	10.35	10.17	10.97	10.58	10.43	11.54	10.05	9.26	10.27
4.16667	15.21	14.45	17.06	18.35	18.07	18.98	16.03	15.02	16.91	15.71	14.84	14.41	15.96	14.6	14.24	14.5	14.28	13.96	15.12	14.21	14.17	13.28	12.33	12.06	14.8	14.07	15.5	15.36	14.36	15.87	13.85	12.91	14.62
7.04167	20.83	17.8	20.33	24.89	22.87	23.63	21.18	20.12	21.35	20.73	22.47	18.28	19.26	19.39	18.64	17.95	18.16	17.74	19.36	18.22	17.81	17.43	17.15	15.74	18.9	17.62	19.26	19.79	19.27	21.12	19.16	17.78	22.46
10	24.98	21.52	24.78	31.45	26.99	28.96	25.7	25.79	27.14	25.29	26.41	22.31	22.98	22.99	22	21.23	23.48	22.06	23.02	22.84	22.12	20.36	21.09	19.96	22.06	21.31	23.02	23.83	24.43	25.62	24.49	21.59	29.4
14	30.95	27.15	29.61	37.93	32.72	36.58	30.72	30.53	32.99	30.02	30.81	27.02	27.49	27.83	27.51	25.42	29.53	26.37	28.26	27.41	27.13	26.61	27.16	24.33	26.61	25.06	30.09	28.1	31.64	31.95	30.3	28.84	36.76

[truncated: 7 more sheets: Figure5e, Figure6a, Figure6b, Figure6c, Figure6e, Figure6g, Figure6h]
